# Supplementary material
Source: publisher site journal article supplement (https://www.jstage.jst.go.jp/article/geochemj/47/5/47_2.0275/_supplement/_download/47_2.0275_1.pdf)
Supplement: Supplementary file 1 [file 47_2.0275_1.pdf]

Supplementary Table S1. Major element contents for the Colón-Mito Juan sequence and upper La Luna Formation rocks. TOC values (wt. %) are shown in parentheses.

| Sample   | Type* | Major elements (wt. %) |                                |                                |      |       |                   |                  |                               |             |       |
|----------|-------|------------------------|--------------------------------|--------------------------------|------|-------|-------------------|------------------|-------------------------------|-------------|-------|
|          |       | TiO <sub>2</sub>       | Al <sub>2</sub> O <sub>3</sub> | Fe <sub>2</sub> O <sub>3</sub> | MgO  | CaO   | Na <sub>2</sub> O | K <sub>2</sub> O | P <sub>2</sub> O <sub>5</sub> | C (TOC)     | S     |
| TCMJ 002 | S     | 0.6                    | 5.52                           | 6.36                           | 0.69 | 0.22  | 0.7               | 0.92             | 0.11                          | 0.62 (0.3)  | 0.051 |
| TCMJ 003 | L     | 0.72                   | 13.03                          | 4.86                           | 1.06 | 0.15  | 0.66              | 2.03             | 0.09                          | 0.65 (0.6)  | 0.025 |
| TCMJ 004 | L     | 0.58                   | 12.03                          | 15.73                          | 1.95 | 0.78  | 0.51              | 1.87             | 0.22                          | 1.09 (0.93) | 0.358 |
| TCMJ 005 | S     | 0.31                   | 5.27                           | 3.29                           | 0.85 | 7.3   | 0.59              | 0.68             | 0.11                          | 1.88 (0.3)  | 0.090 |
| TCMJ 010 | L     | 0.77                   | 18.73                          | 3.89                           | 1.55 | 0.31  | 0.7               | 2.67             | 0.07                          | 0.69 (0.62) | 0.287 |
| TCMJ 015 | L     | 0.67                   | 14.75                          | 6.05                           | 1.67 | 0.42  | 1.04              | 2.32             | 0.13                          | 0.74 (0.65) | 0.249 |
| TCMJ 020 | L     | 0.64                   | 14.34                          | 6.54                           | 1.7  | 0.58  | 0.62              | 2.33             | 0.15                          | 0.59 (0.46) | 0.329 |
| TCMJ 025 | L     | 0.57                   | 8.88                           | 5.11                           | 1.3  | 0.38  | 1.04              | 1.25             | 0.12                          | 0.29 (0.2)  | 0.047 |
| TCMJ 030 | L     | 0.45                   | 9.21                           | 6.89                           | 1.36 | 0.52  | 0.93              | 1.66             | 0.16                          | 1.4 (1.2)   | 0.251 |
| TCMJ 035 | St    | 0.55                   | 9.27                           | 6.26                           | 1.2  | 0.5   | 0.88              | 1.33             | 0.13                          | 1 (0.8)     | 0.122 |
| TCMJ 040 | L     | 0.68                   | 10.41                          | 5.23                           | 1.21 | 0.42  | 0.88              | 1.5              | 0.11                          | 0.92 (0.81) | 0.098 |
| TCMJ 045 | L     | 0.75                   | 12.79                          | 5.19                           | 1.46 | 0.42  | 0.86              | 1.84             | 0.11                          | 1.15 (1.06) | 0.131 |
| TCMJ 050 | S     | 0.38                   | 4.95                           | 6.56                           | 1.02 | 6.01  | 0.69              | 0.8              | 0.22                          | 2.14 (0.4)  | 0.278 |
| TCMJ 055 | S     | 0.24                   | 5.64                           | 30.03                          | 3.24 | 7.88  | 0.27              | 0.88             | 3.22                          | 5.35 (0.3)  | 1.599 |
| TCMJ 060 | S     | 0.35                   | 7.39                           | 19.31                          | 2.77 | 2.37  | 0.42              | 0.89             | 0.25                          | 3.19 (0.2)  | 0.182 |
| TCMJ 065 | L     | 0.62                   | 9.18                           | 4.48                           | 1.12 | 0.44  | 0.86              | 1.34             | 0.11                          | 0.85 (0.75) | 0.186 |
| TCMJ 070 | L     | 0.7                    | 16.05                          | 5.89                           | 1.44 | 0.55  | 0.8               | 2.11             | 0.12                          | 0.99 (0.87) | 0.163 |
| TCMJ 075 | L     | 0.69                   | 13.38                          | 4.8                            | 1.19 | 0.39  | 0.82              | 1.95             | 0.13                          | 0.54 (0.45) | 0.071 |
| TCMJ 080 | S     | 0.32                   | 4.08                           | 8.45                           | 0.93 | 3.98  | 0.57              | 0.53             | 0.18                          | 1.3 (0.45)  | 0.051 |
| TCMJ 085 | L     | 0.63                   | 9.5                            | 5.98                           | 1.23 | 0.79  | 0.84              | 1.35             | 0.1                           | 0.58 (0.41) | 0.062 |
| TCMJ 090 | S     | 0.68                   | 9.23                           | 4.33                           | 1.16 | 0.53  | 0.93              | 1.39             | 0.08                          | 0.24 (0.12) | 0.124 |
| TCMJ 095 | L     | 0.76                   | 14.91                          | 5.83                           | 1.73 | 0.43  | 0.8               | 2.58             | 0.09                          | 0.28 (0.18) | 0.177 |
| TCMJ 100 | L     | 0.72                   | 16.21                          | 7.09                           | 1.82 | 0.69  | 0.75              | 2.53             | 0.14                          | 0.83 (0.68) | 0.117 |
| TCMJ 105 | L     | 0.74                   | 12.51                          | 6.56                           | 1.56 | 0.5   | 0.7               | 2.32             | 0.13                          | 0.59 (0.48) | 0.046 |
| TCMJ 110 | S     | 0.41                   | 4.6                            | 5.59                           | 1.13 | 11.09 | 0.53              | 0.97             | 0.42                          | 2.39 (0.01) | 0.351 |
| TCMJ 115 | L     | 0.71                   | 12.68                          | 4.63                           | 1.35 | 0.41  | 0.84              | 1.96             | 0.09                          | 0.33 (0.24) | 0.551 |
| TCMJ 120 | L     | 0.7                    | 13.89                          | 6.06                           | 1.79 | 0.58  | 0.82              | 2.18             | 0.11                          | 0.52 (0.39) | 0.276 |
| TCMJ 125 | S     | 0.39                   | 5.59                           | 4.09                           | 0.93 | 12.05 | 0.53              | 1                | 0.32                          | 2.65 (0.16) | 0.308 |
| TCMJ 130 | L     | 0.62                   | 11.59                          | 4.83                           | 1.4  | 0.52  | 1.08              | 1.61             | 0.1                           | 0.22 (0.1)  | 0.181 |
| TCMJ 135 | L     | 0.69                   | 13.38                          | 5.89                           | 1.58 | 0.64  | 0.86              | 2.1              | 0.12                          | 0.55 (0.41) | 0.770 |
| TCMJ 140 | L     | 0.79                   | 14.1                           | 5.45                           | 1.72 | 0.38  | 0.81              | 2.44             | 0.11                          | 0.46 (0.37) | 0.248 |
| TCMJ 145 | L     | 0.71                   | 10.64                          | 5.08                           | 1.45 | 0.61  | 0.85              | 1.95             | 0.1                           | 0.41 (0.27) | 0.279 |
| TCMJ 150 | Lm    | 0.14                   | 2.99                           | 9.32                           | 1.66 | 40.83 | 0.15              | 0.58             | 0.33                          | 9.15 (0.4)  | 0.380 |
| TCMJ 155 | Lm    | 0.67                   | 10.22                          | 4.28                           | 1.3  | 0.6   | 0.96              | 1.57             | 0.1                           | 0.39 (0.26) | 0.278 |
| TCMJ 160 | S     | 0.57                   | 5.98                           | 3.99                           | 1.1  | 0.77  | 0.94              | 1.1              | 0.09                          | 0.22 (0.05) | 0.179 |
| TCMJ 165 | S     | 0.66                   | 8.77                           | 4.39                           | 1.17 | 0.54  | 1.02              | 1.37             | 0.09                          | 0.16 (0.04) | 0.138 |
| TCMJ 170 | S     | 0.7                    | 11.81                          | 4.58                           | 1.44 | 0.6   | 0.86              | 1.81             | 0.09                          | 0.45 (0.32) | 0.359 |
| TCMJ 175 | S     | 0.46                   | 5.95                           | 3.7                            | 0.99 | 8.24  | 0.77              | 0.89             | 0.07                          | 1.57 (0.02) | 0.113 |
| TCMJ 180 | S     | 0.6                    | 7.03                           | 4.46                           | 1.17 | 1.42  | 0.81              | 1.01             | 0.1                           | 0.34 (0.04) | 0.088 |
| TCMJ 185 | L     | 0.7                    | 11.47                          | 5.65                           | 1.41 | 0.65  | 0.8               | 1.82             | 0.11                          | 0.91 (0.77) | 0.524 |
| TCMJ 190 | L     | 0.73                   | 14.63                          | 5.48                           | 1.83 | 0.8   | 0.82              | 2.34             | 0.2                           | 0.36 (0.18) | 0.310 |
| TCMJ 195 | S     | 0.43                   | 4.61                           | 4.19                           | 0.89 | 1.54  | 0.74              | 0.56             | 0.1                           | 1.01 (0.5)  | 0.105 |

|                 |    |      |       |       |      |       |      |      |      |             |       |
|-----------------|----|------|-------|-------|------|-------|------|------|------|-------------|-------|
| <b>TCMJ 200</b> | S  | 0.35 | 6.01  | 3.35  | 0.76 | 8.1   | 0.42 | 0.89 | 0.12 | 1.58 (0.02) | 0.200 |
| <b>TCMJ 205</b> | L  | 0.73 | 16.95 | 5.83  | 1.76 | 0.61  | 0.63 | 2.8  | 0.1  | 0.49 (0.35) | 0.111 |
| <b>TCMJ 210</b> | L  | 0.73 | 14.59 | 5.72  | 1.73 | 0.68  | 0.66 | 2.56 | 0.1  | 0.74 (0.59) | 0.185 |
| <b>TCMJ 215</b> | L  | 0.47 | 11.02 | 6.23  | 1.36 | 0.52  | 0.59 | 2.5  | 0.1  | 0.51 (0.39) | 0.171 |
| <b>TCMJ 220</b> | L  | 0.64 | 13.26 | 10.65 | 1.95 | 0.86  | 0.62 | 2.37 | 0.15 | 1.11 (0.92) | 0.158 |
| <b>TCMJ 225</b> | L  | 0.8  | 18.95 | 5.46  | 1.9  | 0.64  | 0.63 | 3.17 | 0.09 | 0.16 (0.02) | 0.173 |
| <b>TCMJ 230</b> | L  | 0.79 | 17.12 | 5.75  | 1.75 | 0.61  | 0.62 | 2.86 | 0.1  | 0.21 (0.08) | 0.055 |
| <b>TCMJ 235</b> | L  | 0.74 | 14.45 | 5.73  | 1.66 | 0.52  | 0.59 | 2.69 | 0.11 | 0.31 (0.2)  | 0.102 |
| <b>TCMJ 240</b> | Lm | 0.2  | 3.25  | 9.82  | 1.58 | 28.65 | 0.2  | 0.56 | 0.31 | 7.39 (1.25) | 0.110 |
| <b>TCMJ 245</b> | Lm | 0.52 | 5.85  | 5.02  | 1.08 | 1.32  | 0.58 | 0.88 | 0.11 | 0.53 (0.24) | 0.159 |
| <b>TCMJ 250</b> | L  | 0.74 | 15.04 | 6.23  | 1.58 | 0.52  | 0.77 | 2.46 | 0.13 | 0.93 (0.81) | 0.184 |
| <b>TCMJ 255</b> | S  | 0.29 | 5.59  | 5.53  | 1.17 | 27.49 | 0.3  | 0.98 | 0.31 | 5.9 (0.01)  | 0.197 |
| <b>TCMJ 260</b> | L  | 0.73 | 13.53 | 5.68  | 1.75 | 0.62  | 0.88 | 2.13 | 0.11 | 0.26 (0.12) | 0.522 |
| <b>TCMJ 265</b> | L  | 0.83 | 18.07 | 5.61  | 2.05 | 0.67  | 0.63 | 3.05 | 0.1  | 0.2 (0.05)  | 0.304 |
| <b>TCMJ 270</b> | L  | 0.58 | 7.56  | 4.4   | 1.28 | 3.66  | 0.97 | 1.29 | 0.09 | 0.79 (0.01) | 0.098 |
| <b>TCMJ 275</b> | L  | 0.89 | 15.79 | 5.56  | 1.89 | 0.63  | 0.84 | 2.38 | 0.14 | 0.44 (0.3)  | 0.294 |
| <b>TCMJ 280</b> | S  | 0.13 | 2.1   | 11.78 | 1.83 | 41.32 | 0.09 | 0.19 | 0.44 | 9 (0.14)    | 0.088 |
| <b>TCMJ 285</b> | S  | 0.64 | 8.05  | 6.61  | 1.51 | 0.66  | 1.08 | 1.27 | 0.13 | 0.57 (0.43) | 0.142 |
| <b>TCMJ 290</b> | L  | 1.35 | 12.95 | 5.85  | 2.41 | 0.77  | 0.98 | 3.12 | 0.25 | 0.31 (0.14) | 0.424 |
| <b>TCMJ 295</b> | L  | 0.73 | 12.45 | 5.09  | 1.73 | 0.75  | 1.13 | 2.15 | 0.12 | 0.29 (0.12) | 0.260 |
| <b>TCMJ 300</b> | L  | 0.69 | 11.85 | 6.01  | 1.48 | 0.61  | 0.86 | 1.96 | 0.1  | 0.27 (0.14) | 0.365 |
| <b>TCMJ 305</b> | L  | 0.73 | 14.56 | 5.18  | 1.91 | 0.81  | 0.96 | 2.32 | 0.12 | 0.36 (0.19) | 0.353 |
| <b>TCMJ 310</b> | L  | 0.74 | 16.51 | 8.05  | 1.94 | 0.78  | 0.69 | 2.69 | 0.11 | 1.08 (0.91) | 0.472 |
| <b>TCMJ 315</b> | L  | 0.75 | 17.26 | 6.39  | 1.89 | 0.67  | 0.74 | 2.92 | 0.09 | 0.52 (0.38) | 0.205 |
| <b>TCMJ 320</b> | L  | 0.83 | 15.97 | 5.41  | 1.83 | 0.55  | 0.53 | 2.87 | 0.09 | 0.38 (0.26) | 0.249 |
| <b>TCMJ 325</b> | L  | 0.68 | 10.67 | 5.56  | 1.53 | 0.52  | 0.55 | 2.31 | 0.11 | 0.32 (0.2)  | 0.054 |
| <b>TCMJ 330</b> | L  | 0.78 | 15.88 | 6.98  | 1.67 | 0.46  | 0.78 | 2.74 | 0.1  | 0.57 (0.47) | 0.122 |
| <b>TCMJ 335</b> | L  | 0.76 | 13.98 | 5.58  | 1.7  | 0.66  | 0.65 | 2.57 | 0.13 | 0.37 (0.23) | 0.147 |
| <b>TCMJ 340</b> | L  | 0.78 | 14.2  | 6.72  | 1.74 | 0.63  | 0.61 | 2.61 | 0.11 | 0.72 (0.58) | 0.184 |
| <b>TCMJ 345</b> | L  | 0.74 | 17.34 | 6.81  | 1.89 | 0.77  | 0.74 | 2.79 | 0.13 | 0.58 (0.41) | 0.165 |
| <b>TCMJ 350</b> | L  | 0.75 | 17.71 | 7.18  | 1.92 | 0.78  | 0.63 | 2.79 | 0.13 | 0.78 (0.61) | 0.171 |
| <b>TCMJ 355</b> | S  | 0.28 | 6.95  | 22.45 | 3.99 | 15.66 | 0.24 | 1.04 | 0.81 | 6.4 (0.5)   | 0.365 |
| <b>TCMJ 360</b> | St | 0.81 | 14.38 | 5.25  | 1.64 | 0.88  | 0.8  | 2.31 | 0.1  | 0.91 (0.71) | 0.323 |
| <b>TCMJ 365</b> | L  | 0.73 | 18.05 | 5.82  | 1.61 | 0.84  | 0.77 | 2.22 | 0.09 | 0.43 (0.25) | 0.353 |
| <b>TCMJ 370</b> | L  | 0.81 | 26.45 | 5.48  | 1.97 | 0.67  | 0.71 | 3.03 | 0.1  | 0.32 (0.18) | 0.045 |
| <b>TCMJ 375</b> | L  | 0.79 | 31.92 | 5.31  | 2.16 | 0.96  | 0.63 | 3.23 | 0.1  | 0.55 (0.35) | 0.096 |
| <b>TCMJ 380</b> | Lm | 0.42 | 4.52  | 2.97  | 0.68 | 9.57  | 0.69 | 0.47 | 0.07 | 2.19 (0.14) | 0.132 |
| <b>TCMJ 385</b> | L  | 0.74 | 17.72 | 6.33  | 1.76 | 0.81  | 0.75 | 2.42 | 0.11 | 0.41 (0.23) | 0.199 |
| <b>TCMJ 390</b> | S  | 0.55 | 6.27  | 3.63  | 0.96 | 5.56  | 0.7  | 0.9  | 0.08 | 1.6 (0.4)   | 0.209 |
| <b>TCMJ 395</b> | S  | 0.19 | 3.99  | 15.73 | 2.69 | 25.64 | 0.18 | 0.62 | 0.48 | 8.24 (0.5)  | 0.098 |
| <b>TCMJ 400</b> | L  | 0.69 | 17.67 | 6.26  | 1.82 | 0.78  | 0.69 | 2.46 | 0.11 | 0.56 (0.4)  | 0.123 |
| <b>TCMJ 405</b> | L  | 0.67 | 17.44 | 6.32  | 1.74 | 0.69  | 0.66 | 2.45 | 0.13 | 0.42 (0.28) | 0.234 |
| <b>TCMJ 410</b> | L  | 0.72 | 18.41 | 6.19  | 1.91 | 0.78  | 0.7  | 2.41 | 0.13 | 0.47 (0.30) | 0.122 |
| <b>TCMJ 415</b> | L  | 0.73 | 24.64 | 5.98  | 2.07 | 0.87  | 0.66 | 2.81 | 0.11 | 0.33 (0.15) | 0.381 |
| <b>TCMJ 420</b> | L  | 0.52 | 11.38 | 6.91  | 1.53 | 13.11 | 0.51 | 1.7  | 0.23 | 3.41 (0.61) | 0.333 |
| <b>TCMJ 425</b> | L  | 0.67 | 15.27 | 5.39  | 1.69 | 0.62  | 0.85 | 2.29 | 0.1  | 0.38 (0.24) | 0.235 |

|                 |    |      |       |      |      |      |      |      |      |             |       |
|-----------------|----|------|-------|------|------|------|------|------|------|-------------|-------|
| <b>TCMJ 430</b> | L  | 0.69 | 18.38 | 5.05 | 1.76 | 0.65 | 0.69 | 2.3  | 0.11 | 0.23 (0.09) | 0.108 |
| <b>TCMJ 435</b> | L  | 0.69 | 18.39 | 5.66 | 1.85 | 0.68 | 0.73 | 2.35 | 0.1  | 0.48 (0.34) | 0.272 |
| <b>TCMJ 440</b> | L  | 0.65 | 16.95 | 9.31 | 2.13 | 1.03 | 0.63 | 2.32 | 0.15 | 1.05 (0.82) | 0.196 |
| <b>TCMJ 445</b> | L  | 0.67 | 18.49 | 5.09 | 1.88 | 1.17 | 0.61 | 2.34 | 0.1  | 0.47 (0.21) | 0.379 |
| <b>TCMJ 450</b> | L  | 0.68 | 17.41 | 5.01 | 1.59 | 0.63 | 0.67 | 2.24 | 0.1  | 0.4 (0.26)  | 0.330 |
| <b>TCMJ 455</b> | L  | 0.72 | 20.77 | 5.95 | 1.84 | 0.69 | 0.71 | 2.42 | 0.1  | 0.51 (0.36) | 0.462 |
| <b>TCMJ 460</b> | L  | 0.7  | 18.07 | 6.15 | 1.71 | 0.71 | 0.7  | 2.28 | 0.1  | 0.42 (0.26) | 0.598 |
| <b>TCMJ 465</b> | L  | 0.6  | 10.7  | 4.18 | 1.1  | 1.07 | 0.7  | 1.35 | 0.09 | 0.42 (0.2)  | 0.482 |
| <b>TCMJ 470</b> | L  | 0.69 | 19.11 | 6.01 | 1.82 | 0.67 | 0.66 | 2.49 | 0.1  | 0.27 (0.13) | 0.339 |
| <b>TCMJ 475</b> | L  | 0.7  | 22.48 | 6.19 | 1.91 | 0.52 | 0.94 | 2.72 | 0.1  | 0.29 (0.18) | 0.576 |
| <b>TCMJ 480</b> | L  | 0.77 | 21.13 | 6.29 | 1.89 | 0.85 | 0.69 | 2.47 | 0.13 | 1.05 (0.86) | 0.079 |
| <b>TCMJ 485</b> | L  | 0.71 | 20.06 | 5.35 | 1.87 | 0.91 | 0.59 | 2.29 | 0.09 | 1.22 (1)    | 0.624 |
| <b>TCMJ 490</b> | St | 0.59 | 10.18 | 4.52 | 1.12 | 1.04 | 0.98 | 1.13 | 0.09 | 0.67 (0.45) | 0.595 |
| <b>TCMJ 495</b> | L  | 0.66 | 17.99 | 5.83 | 1.75 | 0.66 | 0.58 | 2.36 | 0.1  | 0.57 (0.42) | 1.020 |
| <b>TCMJ 500</b> | L  | 0.71 | 18.65 | 5.08 | 1.76 | 0.64 | 0.67 | 2.26 | 0.12 | 0.8 (0.65)  | 0.243 |
| <b>TCMJ 505</b> | L  | 0.13 | 14.88 | 6.15 | 1.81 | 0.46 | 0.97 | 2.56 | 0.13 | 0.76 (0.66) | 0.137 |
| <b>TCMJ 510</b> | L  | 0.73 | 19.88 | 5.82 | 1.86 | 0.53 | 0.92 | 2.34 | 0.14 | 0.79 (0.67) | 0.062 |
| <b>TCMJ 515</b> | L  | 0.73 | 20.27 | 6.85 | 2.2  | 0.53 | 0.97 | 2.67 | 0.12 | 0.86 (0.74) | 0.309 |
| <b>TCMJ 520</b> | L  | 0.71 | 21.83 | 5.89 | 2.01 | 0.7  | 0.97 | 2.63 | 0.11 | 1.28 (1.13) | 0.373 |
| <b>TCMJ 525</b> | L  | 0.68 | 17.98 | 5.63 | 1.94 | 1.29 | 0.67 | 2.2  | 0.11 | 0.93 (0.65) | 0.703 |
| <b>TCMJ 530</b> | L  | 0.66 | 18.37 | 6.56 | 2.14 | 1.83 | 0.77 | 2.56 | 0.11 | 0.94 (0.54) | 1.020 |
| <b>TCMJ 535</b> | L  | 0.63 | 18.77 | 6.01 | 2    | 1.43 | 0.63 | 2.52 | 0.09 | 0.56 (0.25) | 0.786 |
| <b>TCMJ 540</b> | L  | 0.83 | 13.94 | 5.11 | 1.96 | 1.69 | 0.78 | 2.3  | 0.12 | 0.64 (0.27) | 0.900 |
| <b>TCMJ 545</b> | L  | 0.89 | 18.18 | 5.89 | 2.24 | 1.61 | 0.61 | 2.96 | 0.11 | 0.74 (0.39) | 1.047 |
| <b>TCMJ 550</b> | L  | 0.88 | 18.05 | 5.43 | 2.17 | 1.07 | 0.73 | 2.88 | 0.12 | 0.65 (0.43) | 0.331 |
| <b>TCMJ 555</b> | L  | 0.83 | 18.17 | 5.51 | 2.32 | 1.61 | 0.62 | 2.94 | 0.13 | 0.92 (0.72) | 0.579 |
| <b>TCMJ 560</b> | St | 0.76 | 13.76 | 5.32 | 1.6  | 0.89 | 0.66 | 2.14 | 0.16 | 0.65 (0.51) | 0.110 |
| <b>TCMJ 565</b> | L  | 0.78 | 11.35 | 5.09 | 1.83 | 2.23 | 0.9  | 1.8  | 0.12 | 0.91 (0.43) | 0.919 |
| <b>TCMJ 570</b> | L  | 0.85 | 14.67 | 5.78 | 2.25 | 1.67 | 0.7  | 2.62 | 0.13 | 1 (0.64)    | 0.938 |
| <b>TCMJ 575</b> | L  | 0.79 | 15.38 | 6.22 | 2.05 | 1.32 | 0.7  | 2.39 | 0.12 | 0.93 (0.64) | 0.758 |
| <b>TCMJ 580</b> | L  | 0.93 | 23.02 | 6.58 | 2.58 | 0.74 | 0.67 | 3.48 | 0.12 | 0.76 (0.6)  | 0.369 |
| <b>TCMJ 585</b> | L  | 0.79 | 14.36 | 5.88 | 2.09 | 3.34 | 0.7  | 2.35 | 0.13 | 1.34 (0.62) | 0.950 |
| <b>TCMJ 590</b> | L  | 0.8  | 13.2  | 6.09 | 2.32 | 3.01 | 0.59 | 2.47 | 0.17 | 1.2 (0.55)  | 0.913 |
| <b>TCMJ 595</b> | L  | 0.8  | 13.35 | 5.51 | 1.96 | 3.42 | 0.62 | 2.4  | 0.13 | 1.54 (0.8)  | 0.608 |
| <b>TCMJ 600</b> | L  | 0.76 | 10.81 | 5.52 | 1.86 | 1.96 | 0.82 | 2    | 0.17 | 0.89 (0.47) | 0.975 |
| <b>TCMJ 605</b> | L  | 0.84 | 13.57 | 5.03 | 1.87 | 2.29 | 0.98 | 2.05 | 0.13 | 0.91 (0.4)  | 0.917 |
| <b>TCMJ 610</b> | L  | 0.86 | 15.51 | 5.72 | 2.19 | 1.96 | 0.66 | 2.56 | 0.14 | 1.02 (0.42) | 0.871 |
| <b>TCMJ 615</b> | L  | 0.98 | 19.77 | 5.92 | 2.41 | 1.28 | 0.81 | 2.96 | 0.14 | 0.62 (0.34) | 0.892 |
| <b>TCMJ 620</b> | L  | 0.91 | 20.93 | 6.65 | 2.51 | 0.86 | 0.78 | 3.16 | 0.12 | 0.91 (0.72) | 0.356 |
| <b>TCMJ 625</b> | L  | 0.89 | 18.1  | 6.08 | 2.27 | 1.33 | 0.61 | 2.93 | 0.14 | 0.79 (0.5)  | 1.069 |
| <b>TCMJ 630</b> | L  | 0.92 | 21.87 | 5.78 | 2.48 | 0.9  | 0.7  | 3.37 | 0.13 | 0.5 (0.3)   | 0.370 |
| <b>TCMJ 635</b> | L  | 1.1  | 17.39 | 5.36 | 2.17 | 0.5  | 0.82 | 2.89 | 0.14 | 0.5 (0.39)  | 0.106 |
| <b>TCMJ 640</b> | L  | 1    | 20.54 | 5.78 | 2.44 | 0.69 | 0.77 | 3.18 | 0.15 | 0.41 (0.26) | 0.297 |
| <b>TCMJ 645</b> | L  | 1.05 | 21.56 | 4.06 | 1.94 | 0.5  | 0.7  | 2.87 | 0.12 | 0.96 (0.85) | 0.296 |
| <b>TCMJ 650</b> | L  | 1.03 | 35.15 | 4.86 | 3.17 | 1.03 | 0.59 | 4.89 | 0.14 | 0.58 (0.36) | 0.175 |
| <b>TCMJ 655</b> | L  | 0.66 | 16.6  | 7.64 | 1    | 0.07 | 0.4  | 2.56 | 0.14 | 1.18 (1.16) | 0.414 |

|                 |   |      |       |       |      |      |      |      |      |             |       |
|-----------------|---|------|-------|-------|------|------|------|------|------|-------------|-------|
| <b>TCMJ 660</b> | L | 0.64 | 10.99 | 6.38  | 1.82 | 3.38 | 0.51 | 2.35 | 0.13 | 1.75 (1.02) | 1.201 |
| <b>TCMJ 665</b> | L | 0.7  | 11.8  | 8.01  | 1.87 | 0.47 | 0.5  | 2.37 | 0.12 | 0.82 (0.71) | 1.117 |
| <b>TCMJ 670</b> | L | 0.64 | 18.78 | 10.57 | 4.05 | 1.3  | 0.44 | 3.25 | 0.33 | 1.6 (1.32)  | 1.402 |
| <b>TCMJ 675</b> | L | 0.7  | 15.42 | 5.73  | 1.44 | 0.09 | 0.38 | 2.56 | 0.12 | 0.71 (0.69) | 0.020 |
| <b>TCMJ 680</b> | L | 0.73 | 18.37 | 5.66  | 1.84 | 0.13 | 0.38 | 2.87 | 0.14 | 0.85 (0.82) | 0.455 |
| <b>TCMJ 685</b> | L | 0.71 | 18.46 | 4.86  | 2.13 | 0.25 | 0.38 | 2.9  | 0.13 | 0.81 (0.75) | 0.635 |
| <b>TCMJ 690</b> | L | 0.71 | 17.21 | 5.28  | 1.58 | 0.11 | 0.5  | 2.65 | 0.1  | 0.5 (0.47)  | 0.408 |
| <b>TCMJ 695</b> | L | 0.67 | 15.47 | 6.19  | 1.77 | 0.34 | 0.43 | 2.52 | 0.14 | 0.93 (0.85) | 0.987 |
| <b>TCMJ 700</b> | L | 0.63 | 15.71 | 6.62  | 1.63 | 0.21 | 0.44 | 2.43 | 0.12 | 0.88 (0.83) | 0.442 |
| <b>TCMJ 705</b> | L | 0.62 | 12.03 | 6.08  | 1.56 | 2.14 | 0.47 | 2.39 | 0.15 | 1.28 (0.82) | 0.104 |
| <b>TCMJ 710</b> | L | 0.62 | 11.33 | 5.65  | 1.35 | 2.82 | 0.44 | 2.34 | 0.16 | 1.82 (1.21) | 0.044 |
| <b>TCMJ 715</b> | L | 0.66 | 12.88 | 5.78  | 1.68 | 3.4  | 0.49 | 2.47 | 0.2  | 2.04 (1.31) | 0.328 |
| <b>TCMJ 720</b> | L | 0.7  | 15.23 | 5.66  | 1.68 | 2.62 | 0.5  | 2.67 | 0.21 | 1.98 (1.41) | 0.124 |
| <b>TCMJ 725</b> | L | 0.72 | 16.9  | 4.82  | 1.75 | 2.47 | 0.46 | 2.57 | 0.19 | 1.73 (1.2)  | 0.036 |
| <b>TCMJ 730</b> | L | 0.69 | 18.29 | 5.32  | 1.96 | 3.13 | 0.46 | 2.49 | 0.17 | 1.77 (1.09) | 0.187 |
| <b>TCMJ 735</b> | L | 0.68 | 14.81 | 5.52  | 1.66 | 2.43 | 0.47 | 2.65 | 0.16 | 1.6 (1.07)  | 0.108 |
| <b>TCMJ 740</b> | L | 0.63 | 14.21 | 5.72  | 1.46 | 1.89 | 0.44 | 2.45 | 0.15 | 1.44 (1.03) | 0.066 |
| <b>TCMJ 745</b> | L | 0.64 | 14.38 | 5.35  | 1.48 | 0.77 | 0.42 | 2.48 | 0.15 | 1.13 (0.96) | 0.027 |
| <b>TCMJ 750</b> | L | 0.65 | 14.38 | 5.61  | 1.73 | 1.7  | 0.46 | 2.53 | 0.15 | 1.37 (1)    | 0.312 |
| <b>TCMJ 755</b> | L | 0.71 | 15.18 | 4.76  | 1.16 | 0.32 | 0.39 | 2.74 | 0.13 | 1.02 (0.95) | 0.074 |
| <b>TCMJ 760</b> | L | 0.67 | 16.75 | 5.78  | 0.97 | 0.07 | 0.34 | 2.79 | 0.14 | 0.92 (0.9)  | 0.089 |
| <b>TCMJ 765</b> | L | 0.7  | 16.55 | 7.38  | 1.03 | 0.04 | 0.43 | 2.73 | 0.21 | 1.22 (1.21) | 0.108 |
| <b>TCMJ 770</b> | L | 0.76 | 19.15 | 5.58  | 1.71 | 0.36 | 0.44 | 3.06 | 0.18 | 0.86 (0.78) | 0.019 |
| <b>TCMJ 775</b> | L | 0.7  | 15.23 | 7.46  | 1.44 | 0.33 | 0.51 | 2.57 | 0.16 | 0.74 (0.66) | 0.018 |
| <b>TCMJ 780</b> | L | 0.7  | 13.87 | 6.89  | 1.33 | 0.27 | 0.51 | 2.56 | 0.15 | 0.93 (0.87) | 0.030 |
| <b>TCMJ 785</b> | L | 0.7  | 20.01 | 5.32  | 1.01 | 0.03 | 0.32 | 3.06 | 0.11 | 0.43 (0.42) | 0.014 |
| <b>TCMJ 790</b> | L | 0.74 | 18.24 | 5.41  | 1.02 | 0.01 | 0.35 | 3.06 | 0.09 | 0.52 (0.51) | 0.013 |
| <b>TCMJ 795</b> | L | 0.73 | 18.28 | 5.36  | 1.22 | 0.01 | 0.32 | 2.99 | 0.09 | 0.47 (0.46) | 0.010 |
| <b>TCMJ 800</b> | L | 0.73 | 14.73 | 5.09  | 1.34 | 0.04 | 0.31 | 2.65 | 0.12 | 0.46 (0.45) | 0.007 |
| <b>TCMJ 805</b> | L | 0.68 | 16.77 | 6.42  | 1.76 | 0.43 | 0.47 | 2.79 | 0.14 | 0.52 (0.42) | 0.009 |
| <b>TCMJ 810</b> | L | 0.74 | 19.14 | 7.11  | 1.89 | 0.59 | 0.49 | 3.3  | 0.16 | 0.66 (0.53) | 0.010 |
| <b>TCMJ 815</b> | L | 0.76 | 17.9  | 5.52  | 1.68 | 0.65 | 0.5  | 3.18 | 0.14 | 0.72 (0.58) | 0.008 |
| <b>TCMJ 820</b> | L | 0.68 | 15.62 | 6.26  | 1.47 | 0.68 | 0.5  | 2.88 | 0.13 | 0.62 (0.47) | 0.007 |
| <b>TCMJ 825</b> | L | 0.66 | 14.67 | 6.69  | 1.44 | 0.66 | 0.54 | 2.65 | 0.13 | 0.75 (0.6)  | 0.010 |
| <b>TCMJ 830</b> | L | 0.65 | 13.72 | 5.76  | 1.31 | 0.59 | 0.51 | 2.55 | 0.12 | 0.65 (0.52) | 0.014 |
| <b>TCMJ 835</b> | L | 0.66 | 12.29 | 5.73  | 1.28 | 2.44 | 0.47 | 2.56 | 0.14 | 1 (0.47)    | 0.010 |
| <b>TCMJ 840</b> | L | 0.67 | 14.08 | 6.91  | 1.44 | 0.56 | 0.51 | 2.54 | 0.14 | 0.51 (0.39) | 0.007 |
| <b>TCMJ 845</b> | L | 0.7  | 14.84 | 6.12  | 1.37 | 0.62 | 0.55 | 2.45 | 0.14 | 0.58 (0.44) | 0.009 |
| <b>TCMJ 850</b> | L | 0.7  | 15.39 | 6.02  | 1.48 | 0.63 | 0.51 | 2.63 | 0.14 | 0.64 (0.5)  | 0.010 |
| <b>TCMJ 855</b> | L | 0.75 | 18.13 | 6.44  | 1.79 | 0.33 | 0.47 | 3.23 | 0.12 | 0.64 (0.56) | 0.008 |
| <b>TCMJ 860</b> | L | 0.78 | 20.18 | 5.11  | 1.88 | 0.4  | 0.51 | 3.35 | 0.12 | 0.37 (0.36) | 0.008 |
| <b>TCMJ 865</b> | L | 0.71 | 17.16 | 6.42  | 1.65 | 0.48 | 0.51 | 2.94 | 0.14 | 0.73 (0.62) | 0.012 |
| <b>TCMJ 870</b> | L | 0.65 | 15.76 | 4.68  | 1.27 | 0.09 | 0.4  | 2.68 | 0.11 | 0.71 (0.7)  | 0.011 |
| <b>TCMJ 875</b> | L | 0.67 | 13.12 | 6.06  | 1.34 | 0.38 | 0.47 | 2.58 | 0.11 | 0.9 (0.8)   | 0.009 |
| <b>TCMJ 880</b> | L | 0.61 | 15.45 | 6.41  | 1.39 | 0.63 | 0.46 | 2.53 | 0.12 | 0.53 (0.49) | 0.007 |
| <b>TCMJ 885</b> | L | 0.63 | 16.39 | 6.48  | 1.57 | 0.62 | 0.46 | 2.58 | 0.14 | 0.6 (0.46)  | 0.009 |

|                 |   |      |       |      |      |       |      |      |      |             |       |
|-----------------|---|------|-------|------|------|-------|------|------|------|-------------|-------|
| <b>TCMJ 890</b> | L | 0.66 | 16.38 | 6.33 | 1.52 | 0.75  | 0.5  | 2.78 | 0.14 | 0.56 (0.39) | 0.018 |
| <b>TCMJ 895</b> | L | 0.69 | 15.31 | 6.45 | 1.46 | 0.76  | 0.51 | 2.83 | 0.13 | 0.56 (0.39) | 0.027 |
| <b>TCMJ 900</b> | L | 0.41 | 13.14 | 6.12 | 0.9  | 0.23  | 0.35 | 2.74 | 1.02 | 0.9 (0.85)  | 0.254 |
| <b>TLVU 040</b> | S | 0.03 | 2.6   | 2.36 | 3.83 | 30.02 | 0.26 | 0.39 | 4.6  | 6.84 (0.5)  | 0.367 |
| <b>TLVU 035</b> | S | 0.06 | 4.41  | 2.06 | 1.32 | 2.84  | 0.35 | 0.67 | 3.2  | 6.14 (0.4)  | 0.389 |
| <b>TLVU 030</b> | S | 0.04 | 2.4   | 2.72 | 2.47 | 31.59 | 0.31 | 0.61 | 8.77 | 5.25 (0.5)  | 1.111 |
| <b>TLVU 025</b> | L | 0.04 | 5.47  | 3.07 | 0.61 | 13.29 | 0.39 | 0.75 | 8.15 | 4.58 (1.73) | 0.270 |
| <b>TLVU 020</b> | F | 0.14 | 4.68  | 1.43 | 0.28 | 8.45  | 0.19 | 0.54 | 0.79 | 3.2 (1.38)  | 0.057 |
| <b>TLVU 015</b> | F | 0.08 | 2.32  | 0.51 | 0.61 | 9.62  | 0.13 | 0.23 | 0.41 | 2.63 (0.56) | 0.067 |
| <b>TLVU 010</b> | F | 0.01 | 0.28  | 0.14 | 0.48 | 2.36  | 0.07 | 0.03 | 0.36 | 0.69 (0.18) | 0.073 |
| <b>TLVU 005</b> | F | 0.07 | 2.33  | 0.53 | 0.33 | 13.14 | 0.08 | 0.21 | 0.42 | 2.74 (0.4)  | 0.047 |
| <b>PAAS**</b>   | L | 1    | 18.9  | 7.22 | 2.2  | 1.3   | 1.2  | 3.7  | 0.16 | ---         | ---   |
| <b>NASC**</b>   | L | 0.7  | 16.9  | 5.65 | 2.86 | 3.63  | 1.14 | 3.97 | 0.13 | ---         | ---   |
| <b>UCC**</b>    | L | 0.5  | 15.12 | 4.98 | 2.19 | 4.18  | 3.88 | 3.38 | ---  | ---         | ---   |

\* *Lithology: L-shale; S-sandstone; St-siltstone; Lm-limestone; F-chert*

\*\* *Averaged PAAS values from Nyakairu and Koeberl (2001); averaged NASC concentrations from Gromet and colleagues (1984); averaged UCC values from Taylor and McLennan (1985)*

Supplementary Table S2. Trace element concentration for the Colón-Mito Juan sequence and upper La Luna Formation lutites, sandstones, limestones, siltstones, and cherts

| Sample   | Type | Trace elements (mg/kg) |    |    |     |      |     |     |    |    |     |     |    |    |    |      |      |     |    |      |      |      |      |      |     |     |     |
|----------|------|------------------------|----|----|-----|------|-----|-----|----|----|-----|-----|----|----|----|------|------|-----|----|------|------|------|------|------|-----|-----|-----|
|          |      | Rb                     | Cs | Be | Sr  | Th   | U   | Y   | Hf | Mo | V   | Cr  | Co | Cu | Ni | Sc   | La   | Ce  | Nd | Sm   | Eu   | Yb   | Lu   | As   | Sb  | Zn  | Ba  |
| TCMJ 002 | S    | 54                     | 2  | 2  | 81  | 16.9 | 5.1 | 23  | 8  | 3  | 85  | 55  | 13 | 12 | 34 | 9.9  | 42.2 | 89  | 33 | 7.5  | 1.5  | 5.7  | 0.85 | 6.3  | 0.4 | 137 | 560 |
| TCMJ 003 | L    | 110                    | 6  | 4  | 128 | 23.1 | 3.9 | 19  | 8  | 5  | 140 | 73  | 14 | 20 | 26 | 14.7 | 60.5 | 123 | 44 | 8.6  | 1.7  | 4.8  | 0.71 | 6.8  | 0.6 | 125 | 490 |
| TCMJ 004 | L    | 76                     | 5  | 4  | 131 | 20.9 | 3.8 | 20  | 5  | 1  | 164 | 75  | 15 | 19 | 34 | 19.5 | 53.8 | 105 | 42 | 10.4 | 2.3  | 4.9  | 0.74 | 7.9  | 0.8 | 190 | 590 |
| TCMJ 005 | S    | 26                     | 1  | 1  | 150 | 10.4 | 2.4 | 30  | 7  | 1  | 59  | 29  | 19 | 10 | 13 | 5.9  | 28.2 | 64  | 30 | 5.7  | 1.3  | 3.6  | 0.54 | 2.5  | 0.2 | 77  | 260 |
| TCMJ 010 | L    | 143                    | 8  | 5  | 200 | 27.6 | 4.9 | 7   | 5  | 1  | 165 | 102 | 16 | 17 | 34 | 16.8 | 75.3 | 144 | 51 | 7.7  | 1.2  | 4.3  | 0.67 | 7.6  | 0.6 | 120 | 600 |
| TCMJ 015 | L    | 121                    | 7  | 4  | 166 | 21.5 | 5.3 | 14  | 5  | 6  | 172 | 88  | 15 | 24 | 35 | 16.6 | 58.2 | 114 | 43 | 8.5  | 1.8  | 5.2  | 0.79 | 6.5  | 0.6 | 135 | 490 |
| TCMJ 020 | L    | 121                    | 8  | 4  | 147 | 22.6 | 4.2 | 17  | 5  | 1  | 155 | 84  | 16 | 16 | 31 | 16.5 | 64.3 | 124 | 51 | 10.2 | 1.9  | 4.8  | 0.73 | 8    | 0.6 | 156 | 530 |
| TCMJ 025 | L    | 71                     | 5  | 2  | 85  | 17.3 | 3.7 | 12  | 10 | 9  | 121 | 63  | 17 | 17 | 27 | 12.2 | 44.2 | 90  | 28 | 7.4  | 1.6  | 4.9  | 0.74 | 6    | 0.7 | 121 | 330 |
| TCMJ 030 | L    | 73                     | 4  | 3  | 137 | 19.6 | 5.2 | 11  | 7  | 4  | 136 | 61  | 17 | 18 | 26 | 14.2 | 49.5 | 102 | 45 | 8.2  | 1.7  | 4.8  | 0.74 | 6.2  | 0.7 | 119 | 500 |
| TCMJ 035 | St   | 83                     | 4  | 3  | 115 | 18   | 3.8 | 14  | 6  | 1  | 121 | 60  | 18 | 25 | 25 | 13.4 | 47.4 | 103 | 42 | 8.3  | 1.8  | 5.3  | 0.79 | 5.5  | 0.8 | 118 | 820 |
| TCMJ 040 | L    | 62                     | 4  | 3  | 125 | 20.3 | 4.7 | 22  | 9  | 12 | 127 | 61  | 22 | 20 | 27 | 13.4 | 51.1 | 112 | 45 | 8    | 1.6  | 5.2  | 0.8  | 6.8  | 0.7 | 116 | 510 |
| TCMJ 045 | L    | 84                     | 5  | 3  | 145 | 18.5 | 5.7 | 26  | 4  | 1  | 144 | 65  | 18 | 21 | 30 | 14   | 49.7 | 104 | 35 | 8.1  | 1.6  | 5.3  | 0.8  | 4.9  | 0.4 | 129 | 500 |
| TCMJ 050 | S    | 36                     | 3  | 2  | 160 | 15.9 | 2.3 | 41  | 10 | 1  | 78  | 44  | 15 | 11 | 16 | 10.4 | 44   | 108 | 40 | 9.7  | 2.2  | 5.4  | 0.83 | 7.5  | 0.8 | 87  | 150 |
| TCMJ 055 | S    | 70                     | 3  | 4  | 297 | 7.9  | 2.8 | 398 | 1  | 1  | 56  | 29  | 16 | 6  | 22 | 9.1  | 67.1 | 171 | 80 | 25.5 | 17.2 | 10.9 | 1.54 | 45.5 | 2   | 184 | 930 |
| TCMJ 060 | S    | 46                     | 3  | 3  | 110 | 12.1 | 3.2 | 40  | 4  | 1  | 84  | 39  | 15 | 12 | 20 | 13   | 35.4 | 85  | 35 | 9.2  | 2    | 4.8  | 0.72 | 4.2  | 0.1 | 138 | 360 |
| TCMJ 065 | L    | 80                     | 4  | 3  | 121 | 18.6 | 4   | 21  | 8  | 1  | 105 | 59  | 38 | 17 | 23 | 11.5 | 47.8 | 103 | 42 | 8    | 1.6  | 5.3  | 0.8  | 4    | 0.4 | 118 | 600 |
| TCMJ 070 | L    | 97                     | 7  | 4  | 182 | 25.4 | 7.1 | 21  | 7  | 1  | 141 | 78  | 18 | 20 | 30 | 16.6 | 65.5 | 135 | 55 | 9.9  | 2.1  | 5.4  | 0.81 | 6.7  | 0.4 | 137 | 480 |
| TCMJ 075 | L    | 143                    | 7  | 4  | 122 | 23.3 | 4.4 | 17  | 7  | 9  | 136 | 75  | 14 | 18 | 24 | 14.1 | 57   | 111 | 42 | 7.7  | 1.5  | 5    | 0.79 | 4.3  | 0.4 | 108 | 410 |
| TCMJ 080 | S    | 8                      | 1  | 2  | 89  | 10.7 | 2.5 | 30  | 9  | 1  | 86  | 33  | 22 | 10 | 17 | 7.4  | 28.2 | 65  | 32 | 6.7  | 1.7  | 3.9  | 0.58 | 11.1 | 0.6 | 76  | 410 |
| TCMJ 085 | L    | 84                     | 3  | 3  | 92  | 18   | 4.4 | 22  | 9  | 9  | 120 | 74  | 25 | 16 | 27 | 12.8 | 52.2 | 107 | 40 | 8.1  | 1.6  | 5.9  | 0.88 | 7.4  | 0.7 | 111 | 390 |
| TCMJ 090 | S    | 69                     | 4  | 3  | 91  | 18   | 3.9 | 20  | 9  | 2  | 121 | 62  | 19 | 16 | 27 | 12.3 | 50.2 | 99  | 37 | 7.1  | 1.3  | 5.4  | 0.81 | 6.9  | 0.9 | 107 | 520 |
| TCMJ 095 | L    | 169                    | 7  | 4  | 169 | 22.1 | 4.2 | 15  | 4  | 13 | 195 | 91  | 17 | 29 | 39 | 18.9 | 64.9 | 122 | 52 | 9.5  | 1.8  | 4.4  | 0.68 | 5.8  | 0.9 | 143 | 680 |
| TCMJ 100 | L    | 120                    | 7  | 4  | 178 | 18.3 | 3.6 | 25  | 4  | 7  | 179 | 86  | 17 | 28 | 35 | 17.1 | 57.5 | 112 | 42 | 8.6  | 1.5  | 4    | 0.61 | 7.9  | 0.9 | 143 | 380 |
| TCMJ 105 | L    | 137                    | 8  | 4  | 141 | 20.8 | 4.6 | 11  | 4  | 5  | 197 | 92  | 17 | 28 | 38 | 18.5 | 62.7 | 123 | 47 | 8.7  | 1.7  | 4.1  | 0.61 | 5.8  | 0.6 | 129 | 540 |
| TCMJ 110 | S    | 53                     | 2  | 2  | 175 | 11.9 | 2.6 | 45  | 6  | 1  | 86  | 57  | 17 | 11 | 20 | 9.4  | 42.2 | 91  | 41 | 8    | 2.3  | 4.4  | 0.67 | 12.1 | 1.5 | 97  | 280 |
| TCMJ 115 | L    | 113                    | 5  | 3  | 119 | 20.6 | 4.3 | 15  | 7  | 1  | 142 | 76  | 18 | 19 | 30 | 14.7 | 61.7 | 122 | 41 | 8.9  | 1.5  | 4.6  | 0.69 | 7.3  | 1.4 | 109 | 530 |
| TCMJ 120 | L    | 93                     | 6  | 4  | 148 | 19.2 | 3.9 | 16  | 6  | 8  | 159 | 82  | 16 | 21 | 33 | 15.8 | 58.2 | 113 | 43 | 8.1  | 1.6  | 4.2  | 0.65 | 6.8  | 0.9 | 118 | 480 |
| TCMJ 125 | S    | 38                     | 2  | 2  | 182 | 11.2 | 2.8 | 45  | 6  | 1  | 73  | 53  | 16 | 10 | 18 | 8.4  | 38   | 81  | 30 | 7.3  | 2.2  | 4.2  | 0.63 | 8    | 0.9 | 83  | 350 |

|                 |    |     |   |   |     |      |     |    |    |   |     |     |      |    |    |      |      |     |    |     |     |     |      |      |     |     |     |
|-----------------|----|-----|---|---|-----|------|-----|----|----|---|-----|-----|------|----|----|------|------|-----|----|-----|-----|-----|------|------|-----|-----|-----|
| <b>TCMJ 130</b> | L  | 98  | 5 | 3 | 128 | 17.1 | 4.9 | 17 | 6  | 1 | 128 | 78  | 21   | 15 | 27 | 13.4 | 48.2 | 94  | 37 | 7.8 | 1.7 | 4.9 | 0.75 | 4.7  | 0.5 | 122 | 530 |
| <b>TCMJ 135</b> | L  | 135 | 7 | 3 | 145 | 19.4 | 5.1 | 24 | 5  | 1 | 149 | 76  | 19   | 19 | 36 | 15.3 | 56.3 | 113 | 43 | 8.9 | 1.8 | 5.1 | 0.78 | 7.3  | 0.8 | 131 | 450 |
| <b>TCMJ 140</b> | L  | 115 | 6 | 4 | 122 | 19.9 | 3.2 | 16 | 3  | 1 | 175 | 81  | 17   | 23 | 39 | 15.5 | 60   | 111 | 41 | 8.4 | 1.7 | 4.6 | 0.69 | 6.9  | 0.6 | 138 | 390 |
| <b>TCMJ 145</b> | L  | 90  | 5 | 3 | 144 | 18.1 | 3.4 | 19 | 8  | 5 | 154 | 74  | 18   | 20 | 32 | 13.3 | 53.5 | 98  | 36 | 7.6 | 1.4 | 4.8 | 0.72 | 5    | 0.6 | 117 | 400 |
| <b>TCMJ 150</b> | Lm | 22  | 2 | 1 | 342 | 7.1  | 3.3 | 27 | 1  | 6 | 145 | 140 | 15   | 6  | 15 | 5.7  | 22.4 | 50  | 16 | 4   | 1.1 | 2.3 | 0.32 | 17.5 | 0.6 | 54  | 200 |
| <b>TCMJ 155</b> | Lm | 58  | 4 | 3 | 97  | 16   | 3.8 | 18 | 9  | 1 | 130 | 63  | 16   | 18 | 26 | 11.5 | 46.5 | 86  | 28 | 6.8 | 1.2 | 4.6 | 0.7  | 6.6  | 0.5 | 97  | 390 |
| <b>TCMJ 160</b> | S  | 33  | 3 | 2 | 70  | 12.8 | 2.9 | 15 | 10 | 7 | 105 | 51  | 27   | 13 | 24 | 9.9  | 36.2 | 72  | 30 | 6.3 | 1.4 | 4.4 | 0.65 | 3.6  | 0.6 | 99  | 360 |
| <b>TCMJ 165</b> | S  | 67  | 3 | 2 | 83  | 16.9 | 4.6 | 19 | 13 | 1 | 114 | 61  | 18   | 15 | 24 | 11.7 | 44.8 | 82  | 34 | 7.2 | 1.5 | 5.7 | 0.84 | 4.7  | 0.4 | 109 | 400 |
| <b>TCMJ 170</b> | S  | 110 | 5 | 3 | 102 | 17.7 | 3.7 | 18 | 8  | 1 | 133 | 64  | 16   | 17 | 31 | 12.4 | 48   | 90  | 35 | 6.8 | 1.3 | 4.7 | 0.71 | 6.9  | 0.6 | 108 | 280 |
| <b>TCMJ 175</b> | S  | 53  | 2 | 2 | 138 | 13.6 | 4.1 | 23 | 11 | 3 | 81  | 42  | 14   | 12 | 16 | 9.9  | 30.1 | 59  | 23 | 4.7 | 0.1 | 4.6 | 0.7  | 4.4  | 0.4 | 88  | 390 |
| <b>TCMJ 180</b> | S  | 33  | 3 | 2 | 77  | 16.2 | 4.1 | 28 | 15 | 3 | 97  | 51  | 28   | 14 | 22 | 10.5 | 41.7 | 86  | 30 | 7.6 | 1.6 | 6.2 | 0.94 | 4.5  | 0.4 | 102 | 380 |
| <b>TCMJ 185</b> | L  | 90  | 5 | 3 | 99  | 18.8 | 4.6 | 26 | 7  | 1 | 141 | 72  | 16   | 18 | 37 | 13.2 | 51.9 | 100 | 32 | 7.5 | 1.5 | 5.1 | 0.79 | 7.7  | 0.7 | 129 | 370 |
| <b>TCMJ 190</b> | L  | 94  | 7 | 4 | 130 | 18.9 | 4.1 | 24 | 3  | 1 | 170 | 79  | 15   | 22 | 36 | 15   | 54.5 | 101 | 42 | 7.5 | 1.7 | 4.3 | 0.64 | 10.6 | 0.7 | 116 | 420 |
| <b>TCMJ 195</b> | S  | 8   | 1 | 1 | 72  | 14.1 | 3.8 | 22 | 14 | 3 | 61  | 34  | 25   | 8  | 17 | 7.2  | 35.6 | 77  | 39 | 6.6 | 1.2 | 4.9 | 0.72 | 4.9  | 0.4 | 79  | 610 |
| <b>TCMJ 200</b> | S  | 47  | 2 | 2 | 146 | 15.9 | 3.2 | 23 | 12 | 1 | 74  | 45  | 17   | 10 | 15 | 8.9  | 44.9 | 92  | 34 | 7.6 | 1.4 | 4.7 | 0.71 | 6.1  | 0.6 | 80  | 240 |
| <b>TCMJ 205</b> | L  | 143 | 7 | 4 | 192 | 20.1 | 4.5 | 17 | 3  | 5 | 199 | 83  | 17   | 29 | 39 | 17.9 | 62.3 | 111 | 44 | 8.5 | 1.6 | 4.2 | 0.63 | 7    | 0.1 | 143 | 580 |
| <b>TCMJ 210</b> | L  | 113 | 7 | 4 | 163 | 20.3 | 4.2 | 17 | 2  | 1 | 182 | 84  | 14   | 27 | 34 | 16.7 | 59.3 | 115 | 44 | 8.1 | 1.4 | 3.9 | 0.59 | 7.1  | 0.8 | 121 | 580 |
| <b>TCMJ 215</b> | L  | 127 | 8 | 4 | 125 | 21.7 | 4.3 | 5  | 2  | 1 | 193 | 96  | 15   | 28 | 41 | 18.2 | 64.5 | 120 | 42 | 8.7 | 1.4 | 4   | 0.62 | 9.4  | 0.7 | 139 | 580 |
| <b>TCMJ 220</b> | L  | 111 | 7 | 4 | 130 | 19.6 | 2.6 | 20 | 4  | 1 | 169 | 78  | 17   | 24 | 32 | 18.5 | 54   | 100 | 28 | 8.2 | 1.7 | 4   | 0.6  | 7.6  | 0.6 | 140 | 510 |
| <b>TCMJ 225</b> | L  | 124 | 7 | 5 | 150 | 18.3 | 3.9 | 18 | 4  | 7 | 214 | 88  | 13   | 33 | 39 | 17.6 | 61.3 | 112 | 45 | 8.4 | 1.5 | 4   | 0.6  | 5.1  | 0.8 | 160 | 590 |
| <b>TCMJ 230</b> | L  | 140 | 7 | 4 | 132 | 18.5 | 3   | 15 | 3  | 9 | 209 | 83  | 11   | 48 | 39 | 16.8 | 58.8 | 109 | 36 | 7.6 | 1.4 | 3.7 | 0.55 | 6.1  | 0.6 | 141 | 390 |
| <b>TCMJ 235</b> | L  | 127 | 7 | 4 | 128 | 19.2 | 3.3 | 12 | 3  | 1 | 206 | 89  | 16   | 29 | 40 | 16.4 | 58.2 | 107 | 38 | 7.6 | 1.4 | 3.5 | 0.52 | 7.1  | 0.8 | 130 | 570 |
| <b>TCMJ 240</b> | Lm | 8   | 1 | 1 | 345 | 5.8  | 1.6 | 41 | 4  | 1 | 56  | 33  | 26   | 5  | 11 | 4.8  | 24.6 | 54  | 31 | 5.9 | 1.8 | 2.5 | 0.39 | 5.9  | 0.6 | 35  | 130 |
| <b>TCMJ 245</b> | Lm | 32  | 2 | 2 | 84  | 13   | 3.3 | 22 | 12 | 2 | 86  | 42  | 17   | 13 | 18 | 7.4  | 35.2 | 66  | 28 | 5.8 | 1.2 | 3.9 | 0.59 | 5.5  | 0.6 | 76  | 230 |
| <b>TCMJ 250</b> | L  | 120 | 7 | 4 | 186 | 21.6 | 4.2 | 26 | 3  | 6 | 152 | 80  | 13   | 19 | 28 | 15   | 62.7 | 115 | 39 | 8.2 | 1.6 | 4.2 | 0.64 | 5.4  | 0.7 | 134 | 470 |
| <b>TCMJ 255</b> | S  | 46  | 2 | 2 | 319 | 10.3 | 2.8 | 50 | 3  | 1 | 92  | 43  | 13   | 9  | 17 | 8.1  | 42.2 | 89  | 37 | 7.8 | 2.3 | 3.6 | 0.54 | 10.6 | 0.9 | 77  | 290 |
| <b>TCMJ 260</b> | L  | 92  | 6 | 3 | 139 | 18.8 | 4.7 | 29 | 6  | 3 | 159 | 66  | 16   | 26 | 34 | 14.1 | 53   | 96  | 39 | 7.6 | 1.5 | 4.8 | 0.71 | 8.1  | 1.1 | 151 | 320 |
| <b>TCMJ 265</b> | L  | 140 | 8 | 5 | 158 | 21.8 | 4.4 | 25 | 3  | 3 | 195 | 77  | 15   | 24 | 38 | 17.3 | 63.7 | 119 | 48 | 8.7 | 1.5 | 3.8 | 0.57 | 6.8  | 0.9 | 118 | 440 |
| <b>TCMJ 270</b> | L  | 65  | 3 | 2 | 100 | 14.7 | 3.1 | 24 | 11 | 7 | 115 | 53  | 25   | 17 | 26 | 12.1 | 35.7 | 70  | 25 | 5.6 | 1.3 | 4.7 | 0.71 | 5.6  | 0.6 | 123 | 260 |
| <b>TCMJ 275</b> | L  | 95  | 6 | 4 | 126 | 17.4 | 3.9 | 23 | 6  | 1 | 174 | 69  | 15.5 | 17 | 35 | 14.5 | 52.8 | 108 | 39 | 7.9 | 1.6 | 4   | 0.62 | 7.8  | 0.8 | 140 | 395 |
| <b>TCMJ 280</b> | S  | 15  | 1 | 1 | 442 | 8.4  | 2.3 | 28 | 2  | 4 | 192 | 74  | 18   | 3  | 11 | 5.9  | 16.1 | 40  | 13 | 3.9 | 1   | 2.7 | 0.4  | 8.3  | 0.3 | 85  | 130 |

|                 |    |     |   |   |     |      |     |    |    |    |     |     |    |    |    |      |      |     |    |      |     |     |      |      |     |     |     |
|-----------------|----|-----|---|---|-----|------|-----|----|----|----|-----|-----|----|----|----|------|------|-----|----|------|-----|-----|------|------|-----|-----|-----|
| <b>TCMJ 285</b> | S  | 72  | 3 | 2 | 95  | 15.6 | 3.8 | 24 | 10 | 3  | 124 | 63  | 21 | 14 | 30 | 11.1 | 41.3 | 80  | 33 | 7.3  | 1.5 | 5.3 | 0.77 | 6.2  | 0.8 | 109 | 290 |
| <b>TCMJ 290</b> | L  | 85  | 4 | 6 | 156 | 17.4 | 3.2 | 17 | 7  | 3  | 315 | 70  | 17 | 36 | 65 | 13.6 | 50.5 | 93  | 34 | 8.1  | 1.6 | 4.6 | 0.7  | 6.6  | 0.5 | 239 | 330 |
| <b>TCMJ 295</b> | L  | 104 | 4 | 4 | 127 | 17.8 | 4.1 | 25 | 10 | 2  | 163 | 71  | 19 | 24 | 35 | 12.8 | 50.7 | 94  | 40 | 7.7  | 1.4 | 4.9 | 0.73 | 7.1  | 0.9 | 134 | 380 |
| <b>TCMJ 300</b> | L  | 112 | 6 | 3 | 149 | 18.9 | 3.8 | 28 | 6  | 5  | 143 | 73  | 15 | 17 | 29 | 14.2 | 51.8 | 96  | 33 | 6.9  | 1.3 | 4.3 | 0.64 | 7    | 0.7 | 121 | 410 |
| <b>TCMJ 305</b> | L  | 86  | 5 | 4 | 160 | 18.5 | 5.1 | 30 | 7  | 3  | 155 | 73  | 18 | 19 | 34 | 13.6 | 54.8 | 103 | 41 | 8    | 1.6 | 4.5 | 0.69 | 6.7  | 1.1 | 126 | 380 |
| <b>TCMJ 310</b> | L  | 111 | 6 | 4 | 208 | 19.9 | 3.3 | 31 | 5  | 4  | 177 | 78  | 16 | 21 | 37 | 15   | 59.6 | 109 | 43 | 8.7  | 1.7 | 4.5 | 0.66 | 6.7  | 1   | 143 | 380 |
| <b>TCMJ 315</b> | L  | 134 | 7 | 5 | 164 | 21   | 4.9 | 28 | 3  | 3  | 175 | 85  | 14 | 22 | 31 | 16.4 | 61.8 | 113 | 41 | 8.5  | 1.6 | 4.3 | 0.67 | 8    | 1   | 117 | 460 |
| <b>TCMJ 320</b> | L  | 127 | 8 | 4 | 136 | 23   | 3.4 | 14 | 3  | 1  | 216 | 90  | 9  | 57 | 41 | 16.5 | 68   | 131 | 44 | 8.5  | 1.4 | 3.9 | 0.59 | 5.9  | 0.6 | 159 | 450 |
| <b>TCMJ 325</b> | L  | 136 | 8 | 4 | 155 | 20.1 | 3.6 | 10 | 4  | 1  | 203 | 83  | 13 | 37 | 37 | 16.9 | 59.8 | 108 | 41 | 7.3  | 1.2 | 4   | 0.6  | 7.1  | 0.8 | 150 | 370 |
| <b>TCMJ 330</b> | L  | 125 | 8 | 5 | 177 | 20.6 | 3.6 | 12 | 3  | 2  | 209 | 82  | 13 | 44 | 37 | 17.8 | 64.9 | 117 | 43 | 8.6  | 1.5 | 4.2 | 0.63 | 6.3  | 0.5 | 126 | 290 |
| <b>TCMJ 335</b> | L  | 140 | 8 | 4 | 151 | 20.4 | 3.7 | 23 | 3  | 6  | 197 | 88  | 13 | 26 | 38 | 17.2 | 63.1 | 115 | 39 | 8.5  | 1.4 | 4.1 | 0.61 | 7.9  | 0.8 | 172 | 530 |
| <b>TCMJ 340</b> | L  | 130 | 8 | 4 | 176 | 21.5 | 4.1 | 26 | 4  | 6  | 195 | 78  | 14 | 25 | 38 | 16.7 | 60.7 | 116 | 40 | 9.4  | 1.7 | 4.4 | 0.67 | 6    | 1   | 147 | 470 |
| <b>TCMJ 345</b> | L  | 121 | 8 | 5 | 175 | 23   | 4.2 | 31 | 3  | 10 | 195 | 91  | 17 | 30 | 37 | 17.5 | 63.5 | 117 | 51 | 8.4  | 1.5 | 4.5 | 0.68 | 7.3  | 0.8 | 151 | 420 |
| <b>TCMJ 350</b> | L  | 153 | 8 | 4 | 177 | 22.3 | 4   | 34 | 4  | 5  | 193 | 93  | 15 | 25 | 37 | 18.4 | 64   | 122 | 43 | 9.6  | 1.8 | 4.4 | 0.64 | 7.1  | 0.9 | 146 | 450 |
| <b>TCMJ 355</b> | S  | 46  | 2 | 3 | 245 | 10.5 | 3.6 | 89 | 2  | 6  | 208 | 66  | 8  | 9  | 21 | 10.5 | 40.1 | 93  | 40 | 11.3 | 3   | 4.7 | 0.69 | 21.7 | 0.8 | 129 | 290 |
| <b>TCMJ 360</b> | St | 122 | 7 | 4 | 155 | 23.8 | 4.6 | 29 | 3  | 8  | 174 | 76  | 18 | 20 | 35 | 16.3 | 66.3 | 126 | 51 | 8.7  | 1.6 | 5.1 | 0.75 | 10.4 | 1.2 | 142 | 390 |
| <b>TCMJ 365</b> | L  | 101 | 6 | 4 | 172 | 23.1 | 4.9 | 28 | 4  | 1  | 152 | 78  | 17 | 31 | 37 | 15.8 | 67   | 121 | 49 | 9.2  | 1.5 | 5.2 | 0.78 | 9.6  | 1.4 | 143 | 440 |
| <b>TCMJ 370</b> | L  | 121 | 8 | 4 | 277 | 22.2 | 4.4 | 40 | 4  | 9  | 189 | 89  | 15 | 37 | 35 | 17.2 | 63.9 | 122 | 46 | 8.7  | 1.7 | 4.3 | 0.66 | 7.1  | 0.8 | 134 | 430 |
| <b>TCMJ 375</b> | L  | 135 | 7 | 5 | 297 | 21.4 | 4   | 64 | 3  | 1  | 180 | 85  | 15 | 43 | 36 | 16.5 | 63.3 | 117 | 42 | 8.5  | 1.3 | 4.3 | 0.64 | 7.3  | 0.9 | 135 | 580 |
| <b>TCMJ 380</b> | Lm | 28  | 3 | 1 | 127 | 13.4 | 3.2 | 28 | 16 | 10 | 49  | 32  | 26 | 10 | 11 | 8    | 27.2 | 60  | 23 | 5.5  | 1.1 | 5   | 0.74 | 5.1  | 0.8 | 131 | 80  |
| <b>TCMJ 385</b> | L  | 144 | 8 | 4 | 191 | 24.1 | 4.4 | 26 | 7  | 1  | 188 | 90  | 16 | 23 | 36 | 18.5 | 70.5 | 132 | 50 | 9.3  | 1.8 | 4.7 | 0.69 | 11.5 | 0.8 | 165 | 460 |
| <b>TCMJ 390</b> | S  | 69  | 3 | 2 | 101 | 16.7 | 4.2 | 27 | 15 | 8  | 77  | 49  | 20 | 10 | 18 | 8.9  | 39.5 | 79  | 31 | 6.3  | 1.3 | 5.6 | 0.86 | 7.7  | 1.3 | 97  | 270 |
| <b>TCMJ 395</b> | S  | 8   | 1 | 2 | 262 | 7    | 2.6 | 45 | 1  | 5  | 131 | 47  | 13 | 10 | 13 | 6.8  | 28.5 | 61  | 23 | 6.5  | 1.6 | 2.9 | 0.41 | 15.7 | 0.3 | 102 | 82  |
| <b>TCMJ 400</b> | L  | 128 | 7 | 4 | 159 | 23   | 3.3 | 24 | 4  | 1  | 190 | 98  | 16 | 22 | 33 | 18.3 | 72.7 | 130 | 55 | 9.1  | 1.7 | 4.3 | 0.65 | 11.5 | 1.1 | 120 | 600 |
| <b>TCMJ 405</b> | L  | 99  | 9 | 4 | 139 | 22.6 | 4.5 | 22 | 4  | 1  | 194 | 101 | 16 | 23 | 35 | 18   | 71.2 | 125 | 47 | 9.3  | 1.7 | 4.4 | 0.67 | 9.7  | 0.8 | 117 | 540 |
| <b>TCMJ 410</b> | L  | 135 | 7 | 4 | 167 | 20.9 | 3.6 | 27 | 4  | 1  | 188 | 86  | 15 | 25 | 34 | 16.8 | 63.3 | 115 | 48 | 8.5  | 1.6 | 3.9 | 0.61 | 8.5  | 0.7 | 122 | 500 |
| <b>TCMJ 415</b> | L  | 137 | 7 | 4 | 205 | 21.2 | 3.8 | 38 | 4  | 12 | 192 | 98  | 15 | 27 | 35 | 18.8 | 64.8 | 132 | 38 | 9.2  | 1.7 | 4.5 | 0.69 | 7.1  | 1.2 | 126 | 590 |
| <b>TCMJ 420</b> | L  | 78  | 5 | 3 | 202 | 17.6 | 4.9 | 53 | 2  | 1  | 134 | 73  | 14 | 34 | 26 | 15   | 55.8 | 124 | 53 | 10.2 | 2.4 | 5   | 0.73 | 27.1 | 1.5 | 89  | 270 |
| <b>TCMJ 425</b> | L  | 126 | 6 | 4 | 178 | 20.6 | 5.3 | 22 | 5  | 1  | 178 | 82  | 14 | 25 | 35 | 17.4 | 60.4 | 116 | 41 | 8    | 1.4 | 4.3 | 0.64 | 7.1  | 0.7 | 123 | 410 |
| <b>TCMJ 430</b> | L  | 116 | 7 | 4 | 151 | 18.5 | 4.3 | 28 | 4  | 1  | 175 | 75  | 13 | 26 | 31 | 14.8 | 56.3 | 111 | 39 | 7.8  | 1.4 | 4.1 | 0.61 | 7.9  | 0.7 | 125 | 500 |
| <b>TCMJ 435</b> | L  | 123 | 7 | 4 | 162 | 20.9 | 4.3 | 25 | 4  | 3  | 178 | 83  | 16 | 24 | 36 | 18.2 | 59.8 | 122 | 31 | 7.9  | 1.3 | 4.6 | 0.65 | 7.9  | 0.8 | 134 | 450 |



|                 |    |     |   |   |     |      |     |    |    |    |     |     |    |    |    |      |      |     |    |      |     |     |      |      |     |     |     |
|-----------------|----|-----|---|---|-----|------|-----|----|----|----|-----|-----|----|----|----|------|------|-----|----|------|-----|-----|------|------|-----|-----|-----|
| <b>TCMJ 440</b> | L  | 117 | 7 | 4 | 166 | 20.7 | 3.8 | 31 | 2  | 8  | 173 | 84  | 14 | 25 | 33 | 18.8 | 60.6 | 129 | 50 | 10.1 | 1.8 | 4.4 | 0.66 | 6.8  | 0.7 | 125 | 280 |
| <b>TCMJ 445</b> | L  | 110 | 7 | 4 | 157 | 19.8 | 4.3 | 25 | 3  | 1  | 173 | 90  | 16 | 20 | 34 | 16.1 | 57.7 | 110 | 43 | 7.6  | 1.3 | 4   | 0.59 | 6.6  | 1.1 | 124 | 420 |
| <b>TCMJ 450</b> | L  | 104 | 8 | 4 | 173 | 22.2 | 4.4 | 23 | 3  | 3  | 166 | 84  | 14 | 19 | 30 | 16.3 | 66.9 | 126 | 47 | 9.4  | 1.6 | 4.2 | 0.63 | 6.3  | 0.6 | 139 | 450 |
| <b>TCMJ 455</b> | L  | 132 | 8 | 4 | 208 | 23.5 | 4.5 | 26 | 4  | 7  | 172 | 90  | 15 | 18 | 34 | 17.4 | 67   | 130 | 44 | 8.7  | 1.3 | 4.7 | 0.71 | 9    | 0.8 | 128 | 390 |
| <b>TCMJ 460</b> | L  | 132 | 8 | 4 | 140 | 22.6 | 5.1 | 25 | 3  | 1  | 162 | 84  | 16 | 34 | 33 | 18   | 65.8 | 135 | 54 | 9    | 1.7 | 4.7 | 0.71 | 6.9  | 0.9 | 130 | 360 |
| <b>TCMJ 465</b> | L  | 87  | 5 | 3 | 112 | 22.6 | 5.6 | 32 | 11 | 1  | 109 | 65  | 19 | 12 | 25 | 13.6 | 58.3 | 124 | 49 | 9.9  | 1.8 | 7   | 1.1  | 5.7  | 1   | 115 | 430 |
| <b>TCMJ 470</b> | L  | 145 | 9 | 4 | 157 | 23   | 3.5 | 28 | 4  | 10 | 184 | 101 | 17 | 23 | 36 | 19.4 | 74.4 | 140 | 43 | 10   | 1.8 | 4.5 | 0.68 | 6.7  | 0.8 | 139 | 420 |
| <b>TCMJ 475</b> | L  | 137 | 8 | 4 | 231 | 21.8 | 4.6 | 32 | 4  | 1  | 192 | 100 | 19 | 23 | 35 | 19.8 | 71.5 | 128 | 42 | 9.1  | 1.6 | 4.4 | 0.66 | 10.4 | 1.1 | 132 | 330 |
| <b>TCMJ 480</b> | L  | 124 | 7 | 4 | 158 | 22.1 | 4.1 | 32 | 3  | 4  | 188 | 86  | 13 | 23 | 33 | 17.2 | 68.5 | 126 | 50 | 9.7  | 1.8 | 4.5 | 0.67 | 6.6  | 0.3 | 141 | 440 |
| <b>TCMJ 485</b> | L  | 122 | 8 | 4 | 196 | 21.6 | 4.3 | 28 | 5  | 1  | 162 | 85  | 18 | 16 | 32 | 15.9 | 67.6 | 121 | 47 | 9.2  | 1.5 | 4.6 | 0.66 | 7.8  | 0.8 | 130 | 430 |
| <b>TCMJ 490</b> | St | 50  | 3 | 2 | 100 | 18.6 | 6.2 | 28 | 8  | 5  | 97  | 67  | 14 | 11 | 21 | 10.9 | 47.9 | 96  | 30 | 7.6  | 1.4 | 6   | 0.9  | 6.6  | 0.5 | 106 | 370 |
| <b>TCMJ 495</b> | L  | 107 | 8 | 4 | 187 | 20.9 | 3.4 | 26 | 4  | 6  | 177 | 88  | 16 | 32 | 36 | 17   | 65.6 | 122 | 43 | 8.8  | 1.6 | 4.2 | 0.62 | 7    | 0.9 | 137 | 420 |
| <b>TCMJ 500</b> | L  | 120 | 6 | 4 | 171 | 20.9 | 4.4 | 25 | 4  | 1  | 170 | 84  | 14 | 20 | 33 | 16.1 | 65   | 120 | 48 | 9.1  | 1.6 | 4.5 | 0.68 | 7.2  | 0.6 | 134 | 530 |
| <b>TCMJ 505</b> | L  | 113 | 7 | 5 | 170 | 21.4 | 3.6 | 18 | 4  | 4  | 179 | 90  | 13 | 20 | 36 | 16.4 | 67.6 | 120 | 46 | 9.4  | 1.6 | 4.3 | 0.63 | 4.5  | 0.5 | 147 | 390 |
| <b>TCMJ 510</b> | L  | 118 | 7 | 4 | 178 | 22.7 | 3.8 | 22 | 5  | 1  | 183 | 96  | 15 | 20 | 35 | 17.9 | 70.2 | 129 | 45 | 9.5  | 1.8 | 4.8 | 0.72 | 4.2  | 0.4 | 141 | 360 |
| <b>TCMJ 515</b> | L  | 132 | 7 | 4 | 207 | 21.3 | 4.2 | 26 | 3  | 10 | 197 | 94  | 14 | 22 | 35 | 17.3 | 67.9 | 125 | 41 | 8.9  | 1.6 | 4   | 0.62 | 5.4  | 0.7 | 134 | 380 |
| <b>TCMJ 520</b> | L  | 145 | 7 | 4 | 214 | 20.9 | 4.6 | 29 | 3  | 1  | 194 | 97  | 14 | 39 | 35 | 16.9 | 65.5 | 116 | 43 | 8.7  | 1.6 | 3.9 | 0.57 | 5.8  | 0.7 | 137 | 400 |
| <b>TCMJ 525</b> | L  | 126 | 6 | 4 | 178 | 22.4 | 4.8 | 30 | 3  | 1  | 151 | 89  | 17 | 14 | 30 | 15.2 | 64.8 | 121 | 51 | 8.9  | 1.7 | 4.4 | 0.63 | 6.1  | 0.7 | 132 | 340 |
| <b>TCMJ 530</b> | L  | 122 | 6 | 4 | 209 | 20.4 | 4.3 | 29 | 2  | 5  | 180 | 97  | 19 | 19 | 37 | 15.7 | 60.7 | 113 | 41 | 8.2  | 1.5 | 3.8 | 0.57 | 9.2  | 0.8 | 128 | 280 |
| <b>TCMJ 535</b> | L  | 129 | 8 | 4 | 207 | 21.2 | 4   | 28 | 4  | 1  | 170 | 101 | 13 | 18 | 32 | 16.2 | 62   | 114 | 40 | 8.4  | 1.5 | 3.8 | 0.56 | 8    | 0.7 | 118 | 440 |
| <b>TCMJ 540</b> | L  | 96  | 5 | 3 | 150 | 16.5 | 3.6 | 22 | 3  | 2  | 174 | 84  | 14 | 1  | 37 | 13.5 | 49.5 | 93  | 30 | 7    | 1.3 | 3.8 | 0.56 | 6.1  | 0.7 | 159 | 370 |
| <b>TCMJ 545</b> | L  | 112 | 7 | 4 | 149 | 19.9 | 4.7 | 23 | 3  | 3  | 208 | 95  | 14 | 11 | 45 | 16   | 60.8 | 116 | 46 | 8    | 1.5 | 3.4 | 0.52 | 7.8  | 0.8 | 166 | 530 |
| <b>TCMJ 550</b> | L  | 121 | 7 | 4 | 159 | 19.9 | 3.8 | 23 | 3  | 4  | 208 | 100 | 16 | 1  | 40 | 16.4 | 61.8 | 109 | 43 | 8.4  | 1.6 | 3.8 | 0.56 | 4    | 0.7 | 157 | 410 |
| <b>TCMJ 555</b> | L  | 127 | 7 | 4 | 181 | 19.7 | 4.3 | 25 | 4  | 4  | 197 | 90  | 12 | 31 | 38 | 14.7 | 57.8 | 105 | 35 | 7.5  | 1.5 | 3.3 | 0.52 | 4.1  | 0.6 | 152 | 360 |
| <b>TCMJ 560</b> | St | 110 | 5 | 4 | 107 | 17.7 | 4.4 | 29 | 4  | 4  | 166 | 96  | 13 | 22 | 35 | 13.4 | 51.6 | 97  | 38 | 7.7  | 1.6 | 4   | 0.6  | 6.9  | 0.6 | 146 | 340 |
| <b>TCMJ 565</b> | L  | 85  | 4 | 3 | 166 | 17.6 | 4.7 | 21 | 4  | 1  | 148 | 88  | 13 | 1  | 32 | 12.7 | 49.1 | 91  | 29 | 7.2  | 1.5 | 4.8 | 0.71 | 4.3  | 0.5 | 145 | 320 |
| <b>TCMJ 570</b> | L  | 119 | 7 | 4 | 178 | 20.1 | 4.4 | 23 | 5  | 4  | 186 | 104 | 13 | 1  | 40 | 15.3 | 58.1 | 107 | 32 | 8    | 1.5 | 3.8 | 0.56 | 5    | 0.6 | 155 | 370 |
| <b>TCMJ 575</b> | L  | 114 | 6 | 4 | 191 | 21.5 | 4.1 | 28 | 4  | 1  | 170 | 105 | 12 | 1  | 35 | 15.4 | 61   | 116 | 44 | 8.7  | 1.6 | 4.1 | 0.62 | 8.9  | 0.6 | 143 | 490 |
| <b>TCMJ 580</b> | L  | 131 | 8 | 5 | 197 | 20.3 | 3.7 | 37 | 3  | 4  | 218 | 92  | 16 | 9  | 38 | 17.8 | 64.1 | 127 | 45 | 8.7  | 1.6 | 3.6 | 0.54 | 5.5  | 0.7 | 191 | 330 |
| <b>TCMJ 585</b> | L  | 119 | 6 | 4 | 159 | 18.4 | 4.5 | 22 | 5  | 5  | 171 | 104 | 18 | 1  | 40 | 14.7 | 55.1 | 113 | 36 | 7.6  | 1.5 | 3.7 | 0.54 | 5.5  | 0.8 | 153 | 340 |
| <b>TCMJ 590</b> | L  | 103 | 6 | 5 | 153 | 15.6 | 3.7 | 25 | 4  | 5  | 187 | 95  | 15 | 1  | 39 | 14.6 | 50.4 | 101 | 33 | 7.3  | 1.5 | 3.2 | 0.48 | 5    | 0.7 | 162 | 260 |

|                 |   |     |   |   |     |      |     |    |   |    |     |      |      |    |     |      |      |     |    |      |     |     |      |      |     |     |     |
|-----------------|---|-----|---|---|-----|------|-----|----|---|----|-----|------|------|----|-----|------|------|-----|----|------|-----|-----|------|------|-----|-----|-----|
| <b>TCMJ 595</b> | L | 96  | 6 | 3 | 179 | 16   | 3.8 | 20 | 4 | 1  | 163 | 95   | 12   | 1  | 34  | 13.7 | 50   | 104 | 36 | 7.2  | 1.4 | 3   | 0.46 | 2.9  | 0.7 | 143 | 360 |
| <b>TCMJ 600</b> | L | 86  | 6 | 3 | 152 | 15.3 | 4.9 | 22 | 6 | 7  | 160 | 85   | 14   | 1  | 35  | 12.9 | 48.1 | 98  | 34 | 7.2  | 1.4 | 3.5 | 0.52 | 5.9  | 0.6 | 134 | 300 |
| <b>TCMJ 605</b> | L | 77  | 5 | 3 | 171 | 14.6 | 4.1 | 27 | 7 | 1  | 152 | 74.5 | 18.5 | 1  | 33  | 12.1 | 43.9 | 92  | 35 | 6.7  | 1.3 | 3.8 | 0.58 | 5.5  | 0.6 | 148 | 265 |
| <b>TCMJ 610</b> | L | 108 | 7 | 4 | 198 | 17.4 | 3.8 | 25 | 4 | 5  | 182 | 88   | 13   | 4  | 39  | 14.2 | 51.9 | 109 | 35 | 7.4  | 1.3 | 3.4 | 0.52 | 4.8  | 0.6 | 253 | 310 |
| <b>TCMJ 615</b> | L | 118 | 6 | 4 | 227 | 18.9 | 4.6 | 32 | 4 | 5  | 204 | 88   | 16   | 2  | 39  | 15   | 56.4 | 112 | 34 | 8    | 1.5 | 3.5 | 0.54 | 6.4  | 0.6 | 163 | 420 |
| <b>TCMJ 620</b> | L | 140 | 9 | 5 | 247 | 19.9 | 3.3 | 29 | 3 | 8  | 217 | 99   | 14   | 10 | 37  | 17.8 | 63.7 | 129 | 45 | 8.8  | 1.7 | 3.8 | 0.57 | 4.7  | 0.6 | 170 | 330 |
| <b>TCMJ 625</b> | L | 105 | 8 | 4 | 191 | 19.2 | 4   | 31 | 4 | 10 | 193 | 108  | 13   | 1  | 38  | 15.8 | 59.9 | 123 | 41 | 8.3  | 1.7 | 3.8 | 0.57 | 7.9  | 1   | 161 | 390 |
| <b>TCMJ 630</b> | L | 135 | 8 | 4 | 218 | 17.7 | 2.6 | 26 | 3 | 7  | 229 | 94   | 14   | 1  | 43  | 16.6 | 57.6 | 115 | 41 | 7.7  | 1.5 | 3.3 | 0.51 | 4.8  | 0.7 | 180 | 310 |
| <b>TCMJ 635</b> | L | 99  | 7 | 4 | 192 | 18.7 | 3.4 | 16 | 3 | 3  | 232 | 81   | 13   | 11 | 41  | 16.5 | 59   | 117 | 39 | 8    | 1.5 | 3.6 | 0.54 | 6.9  | 0.5 | 169 | 310 |
| <b>TCMJ 640</b> | L | 120 | 8 | 4 | 208 | 18.9 | 3.4 | 28 | 3 | 5  | 234 | 84   | 20   | 35 | 53  | 16.9 | 60.5 | 120 | 39 | 8.5  | 1.6 | 3.7 | 0.55 | 20.7 | 1.7 | 180 | 310 |
| <b>TCMJ 645</b> | L | 87  | 7 | 4 | 186 | 18.8 | 4.3 | 28 | 5 | 5  | 209 | 78   | 19   | 9  | 45  | 15.2 | 56.4 | 119 | 39 | 8.2  | 1.5 | 4.1 | 0.63 | 8.8  | 0.6 | 190 | 360 |
| <b>TCMJ 650</b> | L | 119 | 7 | 5 | 245 | 18   | 3.8 | 88 | 3 | 1  | 222 | 83   | 12   | 9  | 39  | 16.1 | 55.6 | 109 | 38 | 7.6  | 1.4 | 3.7 | 0.56 | 6.6  | 0.8 | 159 | 290 |
| <b>TCMJ 655</b> | L | 115 | 7 | 4 | 144 | 19.5 | 6   | 26 | 3 | 7  | 205 | 147  | 10   | 29 | 32  | 15.6 | 58.6 | 112 | 46 | 8.9  | 1.7 | 3.9 | 0.59 | 5.1  | 1   | 178 | 500 |
| <b>TCMJ 660</b> | L | 131 | 8 | 4 | 153 | 20.4 | 5.3 | 19 | 4 | 7  | 198 | 133  | 17   | 22 | 72  | 16.2 | 60.3 | 120 | 40 | 8.1  | 1.6 | 3.8 | 0.57 | 4.3  | 0.7 | 159 | 510 |
| <b>TCMJ 665</b> | L | 154 | 7 | 4 | 96  | 20.6 | 4.9 | 15 | 3 | 12 | 205 | 118  | 26   | 20 | 99  | 16   | 61.1 | 119 | 40 | 8.4  | 1.5 | 3.6 | 0.54 | 5.4  | 0.8 | 279 | 490 |
| <b>TCMJ 670</b> | L | 85  | 6 | 4 | 136 | 18.2 | 3.6 | 58 | 3 | 7  | 199 | 111  | 33   | 22 | 105 | 16.2 | 59.3 | 118 | 45 | 13.1 | 2.7 | 4.2 | 0.63 | 4.7  | 0.6 | 315 | 440 |
| <b>TCMJ 675</b> | L | 146 | 9 | 4 | 94  | 21.1 | 5.3 | 10 | 3 | 6  | 221 | 124  | 32   | 22 | 70  | 17.9 | 64   | 119 | 39 | 7.7  | 1.4 | 3.8 | 0.59 | 3.4  | 0.8 | 268 | 450 |
| <b>TCMJ 680</b> | L | 139 | 8 | 4 | 121 | 20.4 | 5.3 | 11 | 3 | 3  | 228 | 133  | 17   | 24 | 71  | 17.3 | 65   | 120 | 52 | 11.4 | 2.2 | 3.8 | 0.56 | 5.1  | 0.9 | 287 | 470 |
| <b>TCMJ 685</b> | L | 140 | 7 | 4 | 122 | 19.6 | 4.3 | 23 | 3 | 6  | 214 | 118  | 15   | 27 | 61  | 16   | 59.4 | 104 | 45 | 8.5  | 1.6 | 3.3 | 0.51 | 3.4  | 0.9 | 213 | 300 |
| <b>TCMJ 690</b> | L | 120 | 7 | 4 | 115 | 20.8 | 3.9 | 11 | 2 | 3  | 204 | 100  | 20   | 21 | 28  | 16.3 | 61.9 | 115 | 37 | 7.1  | 1.1 | 3.4 | 0.53 | 6    | 0.9 | 110 | 340 |
| <b>TCMJ 695</b> | L | 134 | 8 | 4 | 106 | 20.6 | 4.9 | 13 | 3 | 6  | 204 | 141  | 14   | 27 | 57  | 17.3 | 64.7 | 120 | 35 | 8.9  | 1.6 | 3.9 | 0.6  | 3.9  | 0.8 | 164 | 500 |
| <b>TCMJ 700</b> | L | 146 | 8 | 4 | 107 | 20.5 | 4.4 | 13 | 3 | 1  | 198 | 129  | 15   | 29 | 57  | 17.6 | 63.9 | 120 | 45 | 9.2  | 1.6 | 3.8 | 0.56 | 6.2  | 0.8 | 170 | 350 |
| <b>TCMJ 705</b> | L | 142 | 8 | 4 | 127 | 18.8 | 4.7 | 15 | 3 | 1  | 208 | 140  | 9    | 25 | 51  | 16.1 | 58.1 | 111 | 38 | 7.6  | 1.5 | 3.3 | 0.52 | 5.4  | 1   | 166 | 260 |
| <b>TCMJ 710</b> | L | 139 | 6 | 4 | 146 | 20.9 | 6.2 | 20 | 3 | 13 | 197 | 148  | 8    | 28 | 54  | 15.8 | 63.2 | 116 | 43 | 8.5  | 1.6 | 3.8 | 0.57 | 7.2  | 1.1 | 187 | 480 |
| <b>TCMJ 715</b> | L | 128 | 7 | 4 | 165 | 21.5 | 8.4 | 22 | 4 | 8  | 197 | 146  | 10   | 30 | 57  | 15.8 | 65.2 | 116 | 47 | 8.5  | 1.7 | 3.7 | 0.55 | 7.7  | 1.1 | 208 | 350 |
| <b>TCMJ 720</b> | L | 151 | 8 | 4 | 162 | 22.7 | 9   | 25 | 4 | 13 | 196 | 162  | 9    | 30 | 57  | 16.4 | 69.8 | 126 | 47 | 9    | 1.7 | 3.8 | 0.56 | 6    | 1.2 | 202 | 390 |
| <b>TCMJ 725</b> | L | 123 | 7 | 4 | 165 | 21.6 | 6.9 | 30 | 4 | 5  | 195 | 162  | 8    | 29 | 57  | 15.9 | 64.6 | 120 | 45 | 8.4  | 1.6 | 3.8 | 0.55 | 5.2  | 1.1 | 200 | 380 |
| <b>TCMJ 730</b> | L | 121 | 7 | 4 | 176 | 19.9 | 6.4 | 37 | 4 | 14 | 195 | 138  | 9    | 27 | 54  | 15   | 60.5 | 109 | 37 | 7.9  | 1.6 | 3.4 | 0.52 | 4.9  | 0.9 | 199 | 350 |
| <b>TCMJ 735</b> | L | 122 | 8 | 4 | 150 | 21   | 5.1 | 24 | 3 | 10 | 199 | 152  | 9    | 27 | 56  | 15.5 | 61.9 | 115 | 47 | 8    | 1.6 | 3.8 | 0.57 | 4.2  | 0.8 | 197 | 590 |
| <b>TCMJ 740</b> | L | 114 | 7 | 4 | 129 | 19.7 | 4.8 | 19 | 3 | 4  | 189 | 133  | 9    | 25 | 52  | 14.9 | 58.6 | 109 | 40 | 7.8  | 1.5 | 3.7 | 0.55 | 4.2  | 0.9 | 182 | 390 |
| <b>TCMJ 745</b> | L | 137 | 6 | 4 | 107 | 18.8 | 5.4 | 13 | 3 | 7  | 199 | 129  | 8    | 28 | 56  | 14.9 | 58.3 | 107 | 38 | 7.5  | 1.4 | 3.1 | 0.47 | 4.5  | 0.8 | 195 | 350 |

|                 |   |     |   |   |     |      |     |    |   |    |     |     |    |    |    |      |      |     |    |      |     |     |      |     |     |     |     |
|-----------------|---|-----|---|---|-----|------|-----|----|---|----|-----|-----|----|----|----|------|------|-----|----|------|-----|-----|------|-----|-----|-----|-----|
| <b>TCMJ 750</b> | L | 133 | 7 | 4 | 128 | 20.2 | 5.4 | 22 | 3 | 4  | 203 | 141 | 11 | 26 | 75 | 15.7 | 61.8 | 113 | 48 | 8.5  | 1.7 | 3.4 | 0.53 | 3.6 | 1   | 217 | 470 |
| <b>TCMJ 755</b> | L | 133 | 8 | 4 | 130 | 20.6 | 6   | 11 | 4 | 6  | 221 | 134 | 6  | 25 | 28 | 16.6 | 63.4 | 123 | 45 | 7.3  | 1.2 | 3.4 | 0.54 | 3.4 | 0.8 | 126 | 430 |
| <b>TCMJ 760</b> | L | 140 | 7 | 4 | 128 | 18.8 | 6.3 | 9  | 3 | 8  | 224 | 132 | 6  | 25 | 28 | 16.1 | 60.8 | 114 | 48 | 7.5  | 1.4 | 3.4 | 0.51 | 5.3 | 1.3 | 112 | 400 |
| <b>TCMJ 765</b> | L | 159 | 8 | 5 | 113 | 21.6 | 7.2 | 11 | 4 | 8  | 220 | 156 | 8  | 28 | 34 | 17.7 | 66.7 | 123 | 45 | 8.2  | 1.6 | 4.1 | 0.61 | 5.7 | 1   | 177 | 470 |
| <b>TCMJ 770</b> | L | 124 | 8 | 5 | 168 | 20.5 | 5.9 | 19 | 4 | 1  | 230 | 126 | 9  | 33 | 80 | 16.6 | 63.1 | 116 | 40 | 8    | 1.5 | 3.7 | 0.54 | 2.2 | 1.3 | 181 | 410 |
| <b>TCMJ 775</b> | L | 126 | 7 | 5 | 145 | 20.8 | 5.3 | 21 | 4 | 8  | 218 | 135 | 12 | 29 | 90 | 16.4 | 62.1 | 117 | 35 | 9.1  | 1.7 | 3.8 | 0.56 | 3.7 | 1.4 | 248 | 470 |
| <b>TCMJ 780</b> | L | 134 | 8 | 5 | 102 | 20.8 | 4.6 | 12 | 4 | 6  | 228 | 130 | 13 | 29 | 83 | 16.7 | 61.6 | 113 | 46 | 8.1  | 1.6 | 3.6 | 0.54 | 4.6 | 1.6 | 273 | 520 |
| <b>TCMJ 785</b> | L | 124 | 8 | 5 | 136 | 22.1 | 4   | 14 | 4 | 5  | 230 | 110 | 10 | 28 | 38 | 18.6 | 65.3 | 129 | 58 | 12.2 | 2.6 | 3.7 | 0.56 | 2.8 | 1   | 164 | 630 |
| <b>TCMJ 790</b> | L | 153 | 8 | 5 | 105 | 22.5 | 5.1 | 6  | 4 | 1  | 234 | 111 | 11 | 27 | 33 | 17.9 | 65.3 | 125 | 47 | 8    | 1.5 | 3.4 | 0.52 | 3.6 | 0.9 | 157 | 570 |
| <b>TCMJ 795</b> | L | 140 | 8 | 5 | 100 | 20.9 | 3.5 | 8  | 4 | 3  | 239 | 99  | 17 | 28 | 60 | 17   | 63.3 | 119 | 39 | 7.9  | 1.4 | 3.8 | 0.56 | 3   | 0.9 | 255 | 460 |
| <b>TCMJ 800</b> | L | 111 | 8 | 5 | 103 | 20.4 | 4.5 | 9  | 3 | 1  | 250 | 104 | 20 | 26 | 78 | 16.7 | 61.6 | 111 | 41 | 8.6  | 1.7 | 3.4 | 0.5  | 2.9 | 0.7 | 262 | 560 |
| <b>TCMJ 805</b> | L | 134 | 8 | 5 | 118 | 20.4 | 4.8 | 13 | 3 | 8  | 245 | 113 | 13 | 28 | 53 | 17.6 | 60.4 | 114 | 41 | 7.7  | 1.5 | 3.7 | 0.55 | 3   | 1   | 200 | 550 |
| <b>TCMJ 810</b> | L | 155 | 8 | 5 | 127 | 20.2 | 6   | 15 | 3 | 1  | 249 | 117 | 12 | 30 | 50 | 17.2 | 58.9 | 109 | 43 | 7.7  | 1.6 | 3.8 | 0.56 | 4.4 | 1.1 | 202 | 610 |
| <b>TCMJ 815</b> | L | 155 | 8 | 5 | 129 | 19.5 | 5.1 | 17 | 3 | 1  | 237 | 119 | 9  | 29 | 54 | 16.7 | 58.2 | 115 | 39 | 7.7  | 1.5 | 3.3 | 0.51 | 2.8 | 1   | 193 | 460 |
| <b>TCMJ 820</b> | L | 140 | 8 | 5 | 119 | 19.6 | 4.1 | 12 | 4 | 5  | 227 | 110 | 11 | 30 | 48 | 16.6 | 58.5 | 112 | 41 | 7.6  | 1.2 | 3.7 | 0.55 | 3.6 | 1   | 180 | 450 |
| <b>TCMJ 825</b> | L | 133 | 7 | 5 | 116 | 19.1 | 5   | 11 | 2 | 3  | 220 | 113 | 12 | 32 | 50 | 16.9 | 59.3 | 109 | 44 | 7.9  | 1.5 | 3.6 | 0.54 | 4.1 | 1   | 193 | 550 |
| <b>TCMJ 830</b> | L | 132 | 8 | 5 | 104 | 21   | 4.7 | 10 | 3 | 7  | 225 | 121 | 13 | 34 | 48 | 17.3 | 60.8 | 121 | 41 | 8    | 1.5 | 3.7 | 0.55 | 2.9 | 1.1 | 211 | 400 |
| <b>TCMJ 835</b> | L | 122 | 8 | 4 | 148 | 18.5 | 5   | 17 | 3 | 4  | 221 | 105 | 10 | 27 | 47 | 15.7 | 56.8 | 109 | 41 | 7.6  | 1.5 | 3.3 | 0.5  | 2.9 | 0.9 | 170 | 380 |
| <b>TCMJ 840</b> | L | 134 | 8 | 4 | 111 | 18.9 | 3.8 | 13 | 3 | 6  | 230 | 114 | 13 | 29 | 50 | 17.2 | 59.6 | 113 | 47 | 8.2  | 1.5 | 3.6 | 0.54 | 2.8 | 1.1 | 179 | 570 |
| <b>TCMJ 845</b> | L | 128 | 8 | 5 | 114 | 21.7 | 4.3 | 14 | 4 | 13 | 216 | 124 | 13 | 27 | 54 | 17.6 | 64.1 | 123 | 52 | 9.3  | 2   | 3.9 | 0.58 | 4.4 | 1   | 203 | 570 |
| <b>TCMJ 850</b> | L | 148 | 8 | 5 | 123 | 20.4 | 4.3 | 17 | 2 | 1  | 226 | 114 | 13 | 28 | 51 | 16.1 | 55.4 | 109 | 45 | 8.3  | 1.7 | 3.7 | 0.55 | 3.4 | 1.1 | 187 | 550 |
| <b>TCMJ 855</b> | L | 121 | 6 | 5 | 132 | 20.4 | 5.5 | 20 | 4 | 6  | 228 | 107 | 12 | 27 | 56 | 16   | 54.6 | 107 | 41 | 7.3  | 1.2 | 3.2 | 0.54 | 2.9 | 1   | 207 | 490 |
| <b>TCMJ 860</b> | L | 157 | 7 | 5 | 141 | 20.9 | 4   | 16 | 3 | 4  | 237 | 100 | 10 | 31 | 43 | 18.1 | 63.5 | 120 | 43 | 7.7  | 1.4 | 3.6 | 0.54 | 4.2 | 0.8 | 164 | 510 |
| <b>TCMJ 865</b> | L | 133 | 8 | 5 | 123 | 20.7 | 4.7 | 15 | 3 | 6  | 232 | 127 | 12 | 31 | 56 | 17.8 | 60.5 | 114 | 41 | 8    | 1.4 | 3.7 | 0.55 | 2.9 | 1.3 | 186 | 480 |
| <b>TCMJ 870</b> | L | 139 | 7 | 4 | 98  | 19.3 | 4.4 | 7  | 3 | 7  | 217 | 98  | 8  | 27 | 39 | 16.3 | 58   | 112 | 37 | 7.2  | 1.4 | 3.3 | 0.5  | 4   | 0.9 | 122 | 580 |
| <b>TCMJ 875</b> | L | 141 | 8 | 5 | 99  | 20.4 | 4.8 | 9  | 3 | 6  | 228 | 117 | 13 | 29 | 54 | 17.2 | 59.5 | 114 | 41 | 8.3  | 1.7 | 4   | 0.59 | 3.9 | 0.8 | 180 | 510 |
| <b>TCMJ 880</b> | L | 144 | 8 | 5 | 110 | 21.4 | 3.5 | 12 | 4 | 9  | 209 | 115 | 14 | 31 | 53 | 17.6 | 60.2 | 111 | 41 | 8.6  | 1.7 | 3.7 | 0.58 | 3   | 1.1 | 197 | 670 |
| <b>TCMJ 885</b> | L | 123 | 8 | 5 | 104 | 20.2 | 4.6 | 8  | 3 | 9  | 223 | 108 | 12 | 33 | 55 | 17.2 | 56.8 | 110 | 43 | 8    | 1.5 | 3.3 | 0.5  | 3.4 | 1.1 | 196 | 560 |
| <b>TCMJ 890</b> | L | 156 | 9 | 5 | 120 | 20.5 | 5.1 | 15 | 3 | 9  | 226 | 108 | 11 | 31 | 51 | 17   | 58   | 110 | 44 | 8.2  | 1.6 | 3.6 | 0.54 | 5.2 | 0.8 | 191 | 500 |
| <b>TCMJ 895</b> | L | 169 | 8 | 5 | 119 | 20.2 | 4.4 | 15 | 3 | 7  | 239 | 114 | 13 | 33 | 56 | 18.4 | 60.4 | 116 | 44 | 8.6  | 1.4 | 3.8 | 0.57 | 5.2 | 1.1 | 206 | 560 |
| <b>TCMJ 900</b> | L | 108 | 6 | 4 | 141 | 17.7 | 7.3 | 20 | 3 | 6  | 201 | 157 | 7  | 26 | 39 | 14.6 | 52.1 | 95  | 39 | 7.9  | 1.8 | 2.6 | 0.41 | 8.2 | 1.4 | 140 | 690 |

|                 |   |     |      |     |     |      |      |     |     |     |     |     |      |     |    |      |      |      |      |      |      |      |      |      |      |     |     |
|-----------------|---|-----|------|-----|-----|------|------|-----|-----|-----|-----|-----|------|-----|----|------|------|------|------|------|------|------|------|------|------|-----|-----|
| <b>TLVU 040</b> | S | 8   | 1    | 1   | 796 | 5.8  | 27   | 79  | 3   | 1   | 54  | 77  | 12   | 18  | 32 | 3.4  | 30.8 | 43   | 22   | 4.5  | 1.2  | 3.6  | 0.54 | 8.1  | 1.2  | 37  | 580 |
| <b>TLVU 035</b> | S | 8   | 1    | 1   | 745 | 7    | 30   | 80  | 4   | 3   | 102 | 146 | 8    | 35  | 43 | 5.3  | 34.2 | 45   | 20   | 5.2  | 1.1  | 4.4  | 0.68 | 11.4 | 2.2  | 105 | 460 |
| <b>TLVU 030</b> | S | 8   | 2    | 2   | 989 | 7.3  | 47.1 | 124 | 3   | 5   | 86  | 164 | 9    | 32  | 48 | 4.7  | 49.4 | 56   | 33   | 6.9  | 1.7  | 6.3  | 1.05 | 13.4 | 2.4  | 89  | 520 |
| <b>TLVU 025</b> | L | 40  | 3    | 2   | 886 | 10   | 66.6 | 134 | 3   | 2   | 337 | 283 | 17   | 55  | 79 | 7.6  | 54.9 | 72   | 41   | 7.8  | 1.8  | 6.9  | 1.08 | 35.7 | 8.3  | 275 | 660 |
| <b>TLVU 020</b> | F | 32  | 2    | 1   | 147 | 6.8  | 27.9 | 28  | 1   | 18  | 137 | 121 | 26   | 36  | 58 | 5    | 23.1 | 37   | 13   | 3.2  | 0.7  | 1.8  | 0.28 | 18.5 | 3.7  | 202 | 470 |
| <b>TLVU 015</b> | F | 8   | 1    | 1   | 164 | 3.8  | 8.8  | 19  | 1   | 5   | 88  | 55  | 39   | 21  | 22 | 2.2  | 12   | 20   | 12   | 1.7  | 0.5  | 1.2  | 0.19 | 6.5  | 1.5  | 89  | 530 |
| <b>TLVU 010</b> | F | 8   | 1    | 1   | 51  | 0.1  | 3.5  | 3   | 1   | 12  | 26  | 21  | 35   | 17  | 15 | 0.5  | 1.6  | 3    | 3    | 0.1  | 0.1  | 0.2  | 0.03 | 1.8  | 0.5  | 55  | 100 |
| <b>TLVU 005</b> | F | 8   | 1    | 1   | 220 | 2.8  | 6.8  | 13  | 1   | 14  | 132 | 62  | 28   | 33  | 45 | 2.1  | 9.2  | 17   | 9    | 1.4  | 0.2  | 0.8  | 0.12 | 6.2  | 1.6  | 222 | 510 |
| <b>PAAS</b>     | L | 160 | 15   | --- | 200 | 14.6 | 3.1  | 27  | 5   | --- | 150 | 110 | 23   | 50  | 55 | 16   | 38   | 80   | 32   | 5.6  | 1.1  | 2.8  | 0.43 | ---  | ---  | 85  | 650 |
| <b>NASC</b>     | L | 125 | 5.16 | --- | 142 | 12.3 | 2.66 | 35  | 6.3 | --- | 130 | 125 | 25.7 | --- | 58 | 14.9 | 31.1 | 66.7 | 27.4 | 5.59 | 1.18 | 3.06 | 0.46 | 28.4 | 2.09 | --- | 636 |
| <b>UCC</b>      | L | 112 | 3.7  | --- | 350 | 10.7 | 2.8  | 22  | 5.8 | --- | 60  | 35  | 10   | --- | 20 | 11   | 30   | 64   | 26   | 4.5  | 0.88 | 2.22 | 0.32 | ---  | ---  | --- | 550 |
